# Supplementary material for: High-Throughput Preparation of Antibacterial Polymers from Natural Product Derivatives via the Hantzsch Reaction
Source: PubMed Central journal article supplement — iScience. 2019 Dec 3;23(1):100754. doi: 10.1016/j.isci.2019.100754 (PMC6941863; doi:10.1016/j.isci.2019.100754), 2019-12-03
Supplement: mmc1.pdf [file mmc1.pdf]

ISCI, Volume 23

## **Supplemental Information**

### **High-Throughput Preparation of Antibacterial Polymers from Natural Product Derivatives via the Hantzsch Reaction**

**Guoqiang Liu, Qiang Zhang, Yongsan Li, Xing Wang, Haibo Wu, Yen Wei, Yuan Zeng, and Lei Tao**

## Supporting Data

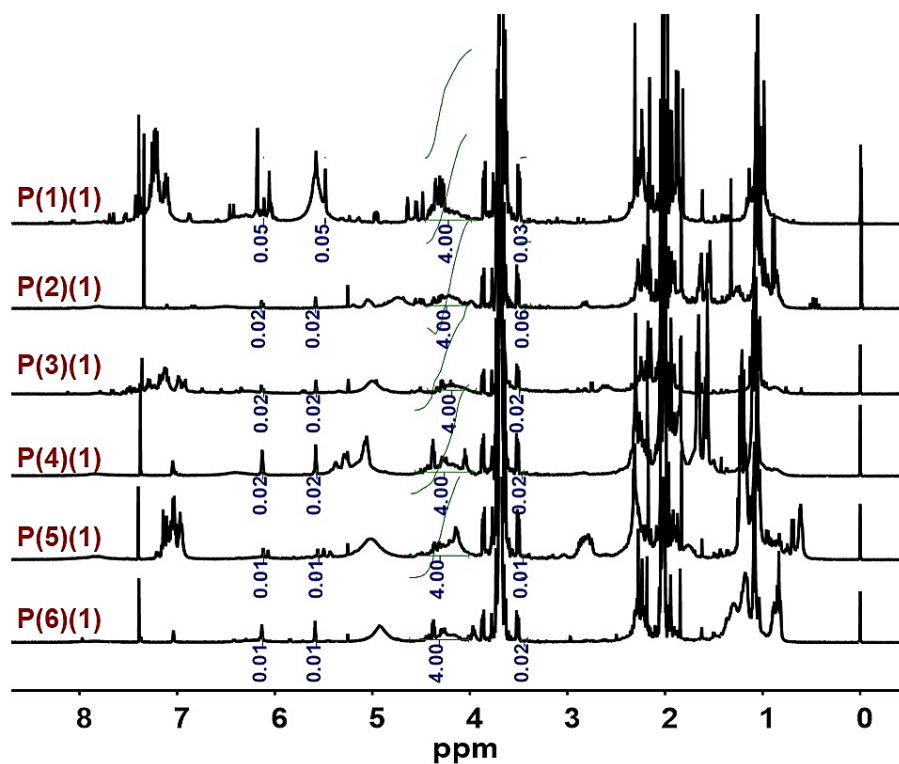

**Figure S1.**  $^1\text{H}$  NMR spectra ( $\text{CDCl}_3$ , 400M) of crude **P(X)(1)** after HTP polymerization for conversion calculation. Related to Figure 1.

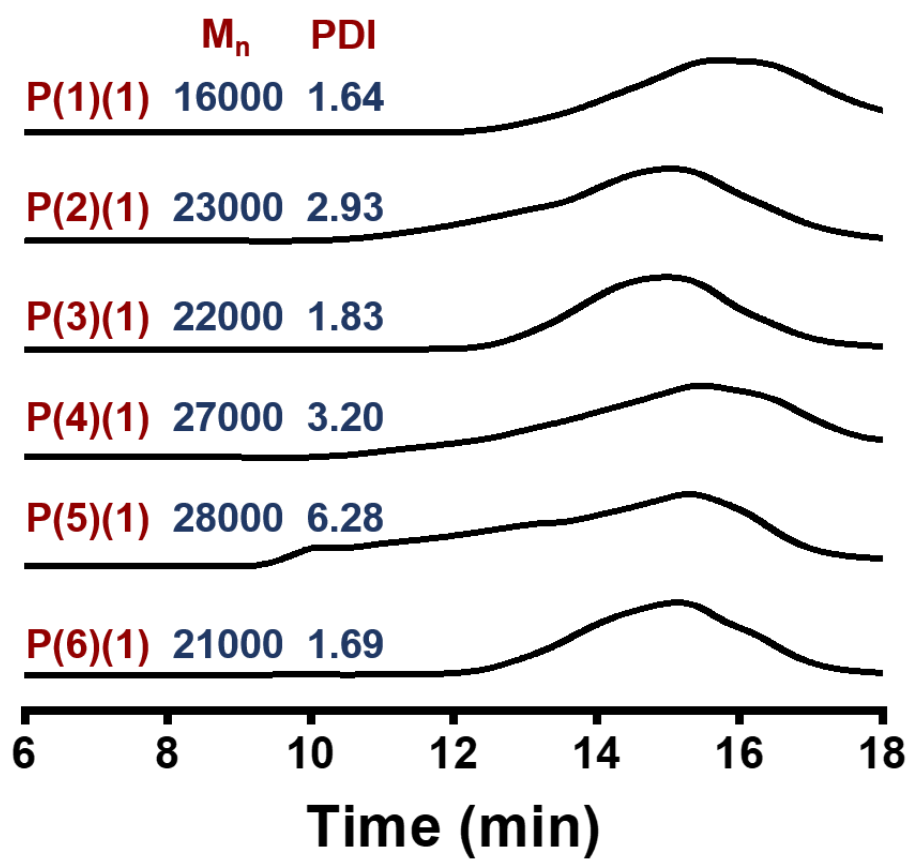

Figure S2. GPC traces of P(X)(1). Related to Figure 1.



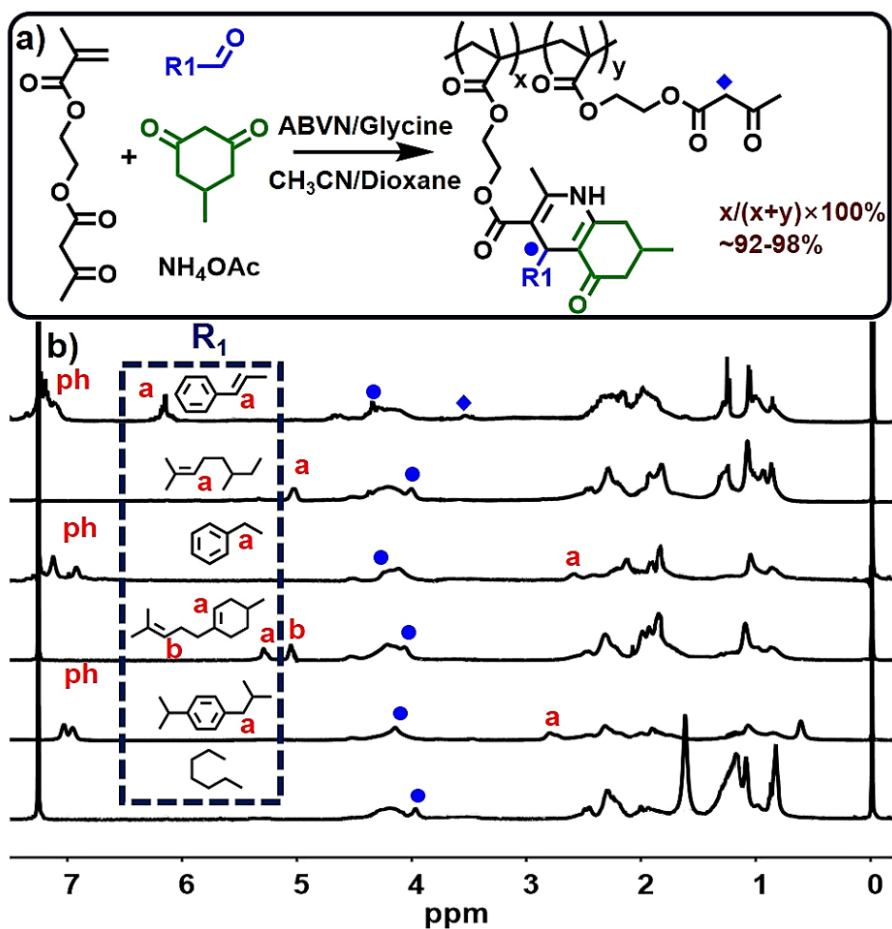

**Figure S4.** a) Reaction conditions: acetonitrile/dioxane (1/1, v/v) as the solvent, glycine (10% to aldehydes) as the Hantzsch reaction catalyst, ABVN (2% to AEMA) as the initiator for FRP, 75°C, and 12 h. **A(X): B(3):** AEMA:  $NH_4OAc$  = 1:1:1:1.5. b)  $^1H$  NMR spectra ( $CDCl_3$ , 400M) of  $P(X)(3)$ . Related to Figure 1.

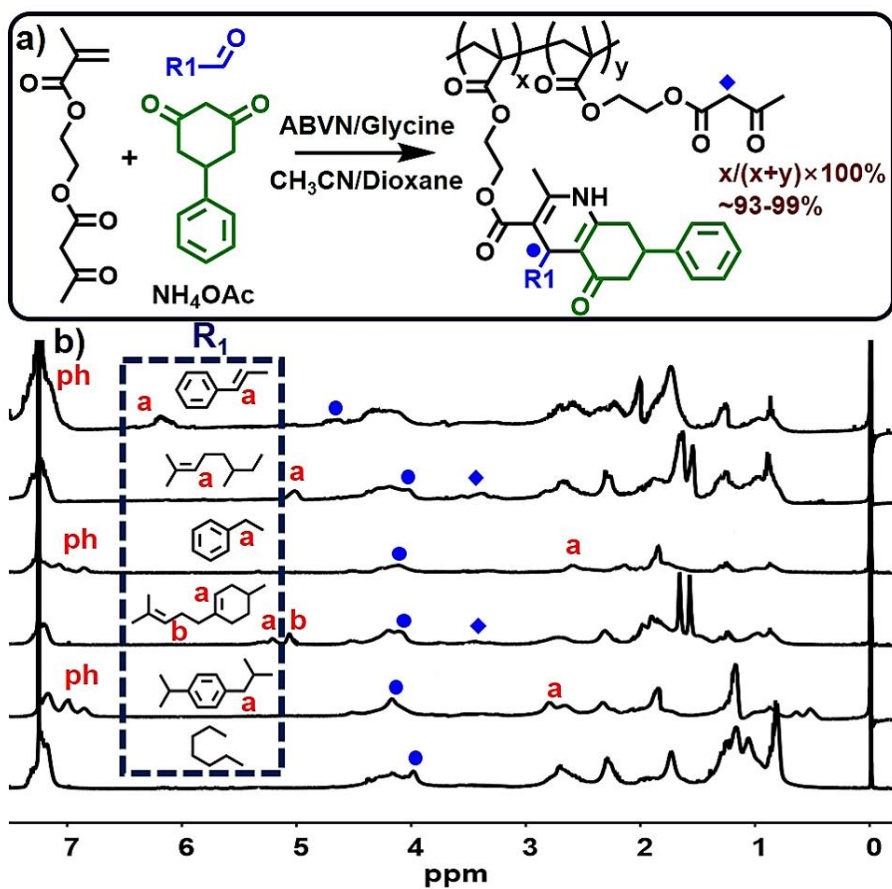

**Figure S5.** a) Reaction conditions: acetonitrile/dioxane (1/1, v/v) as the solvent, glycine (10% to aldehyde) as the Hantzsch reaction catalyst, ABVN (2% to AEMA) as the initiator for FRP, 75°C, and 12 h. **A(X): B(4): AEMA: NH<sub>4</sub>OAc = 1:1:1:1.5.** b) <sup>1</sup>H NMR spectra (CDCl<sub>3</sub>, 400M) of **P(X)(4)**. Related to Figure 1.

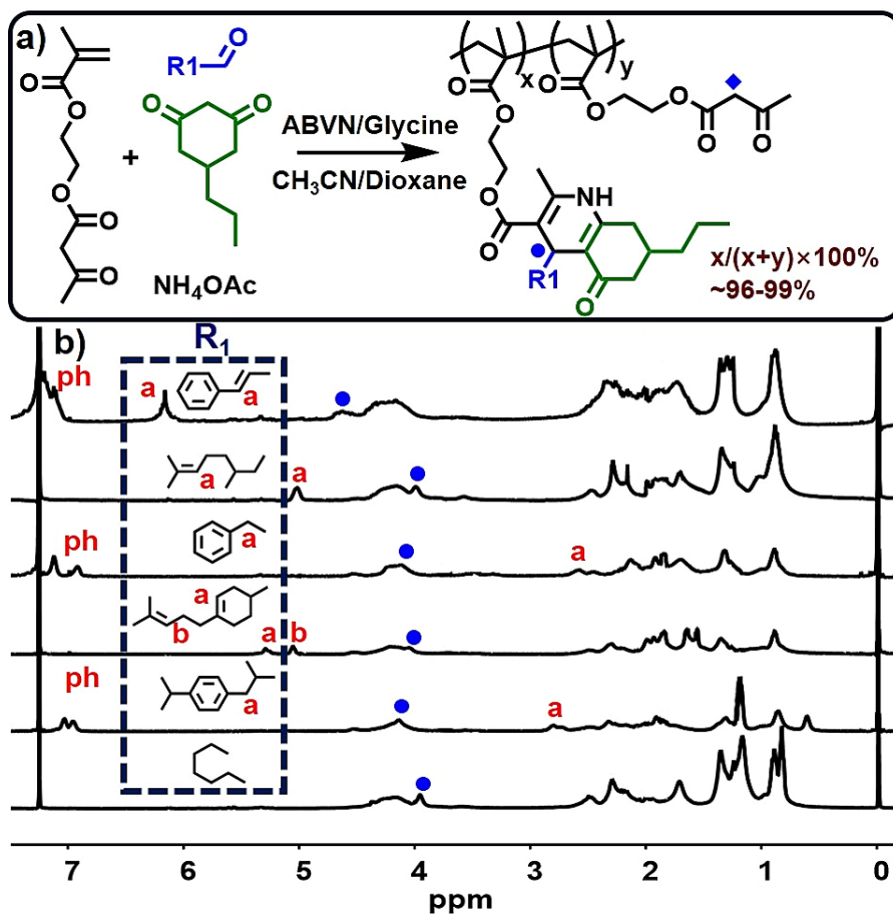

**Figure S6.** a) Reaction conditions: acetonitrile/dioxane (1/1, v/v) as the solvent, glycine (10% to aldehyde) as the Hantzsch reaction catalyst, ABVN (2% to AEMA) as the initiator for FRP, 75°C, and 12 h. **A(X): B(5): AEMA: NH<sub>4</sub>OAc = 1:1:1:1.5.** b) <sup>1</sup>H NMR spectra (CDCl<sub>3</sub>, 400M) of **P(X)(5)**. Related to Figure 1.

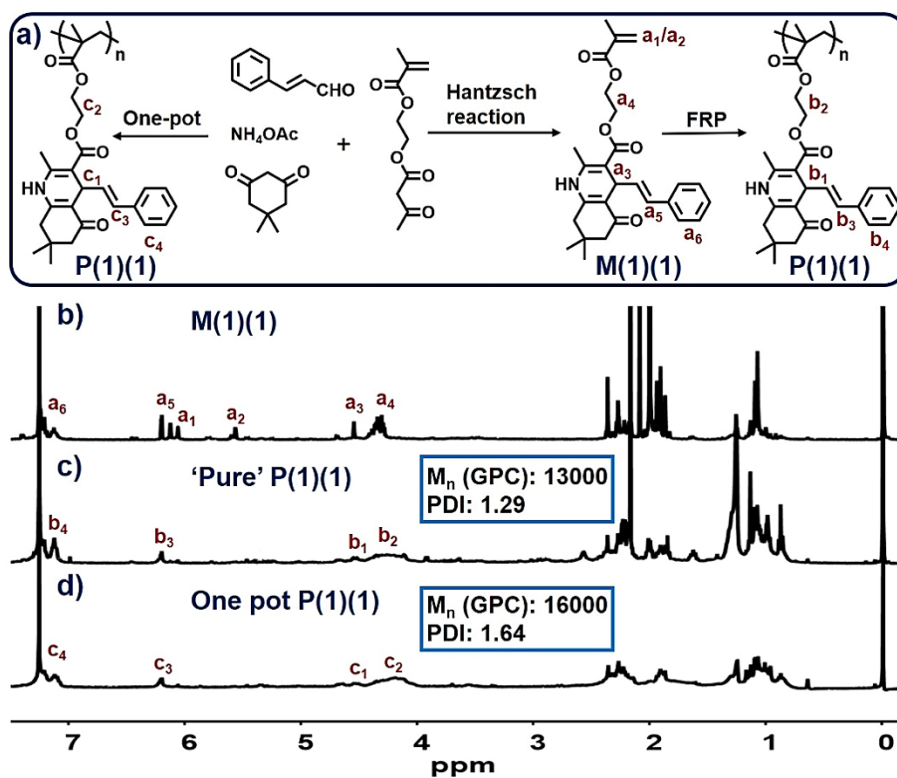

**Figure S7.** a) Preparations of **P(1)(1)** from the traditional monomer–polymer method and one-pot strategy.  $^1\text{H}$  NMR spectra ( $\text{CDCl}_3$ , 400M) of b) **M(1)(1)**, c) “pure” **P(1)(1)**, and d) **P(1)(1)** via the one-pot Hantzsch–FRP method. Related to Figure 1.



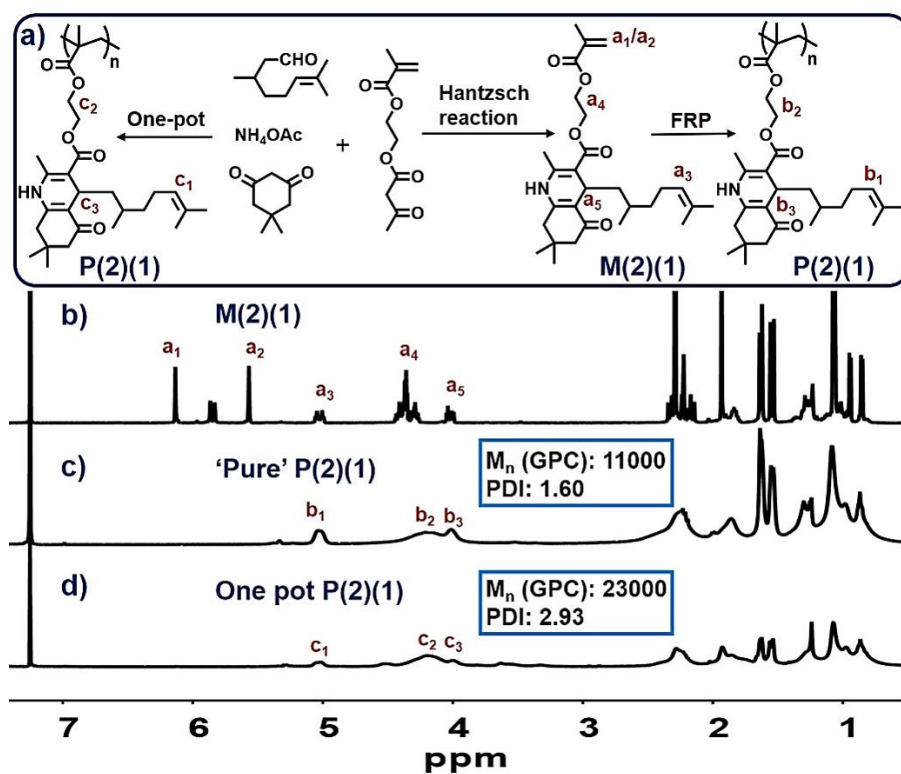

**Figure S8.** a) Preparations of **P(2)(1)** from the traditional monomer–polymer method and one-pot strategy. <sup>1</sup>H NMR spectra (CDCl<sub>3</sub>, 400M) of b) **M(2)(1)**, c) “pure” **P(2)(1)**, and d) **P(2)(1)** *via* the one-pot Hantzsch–FRP method. Related to Figure 1.

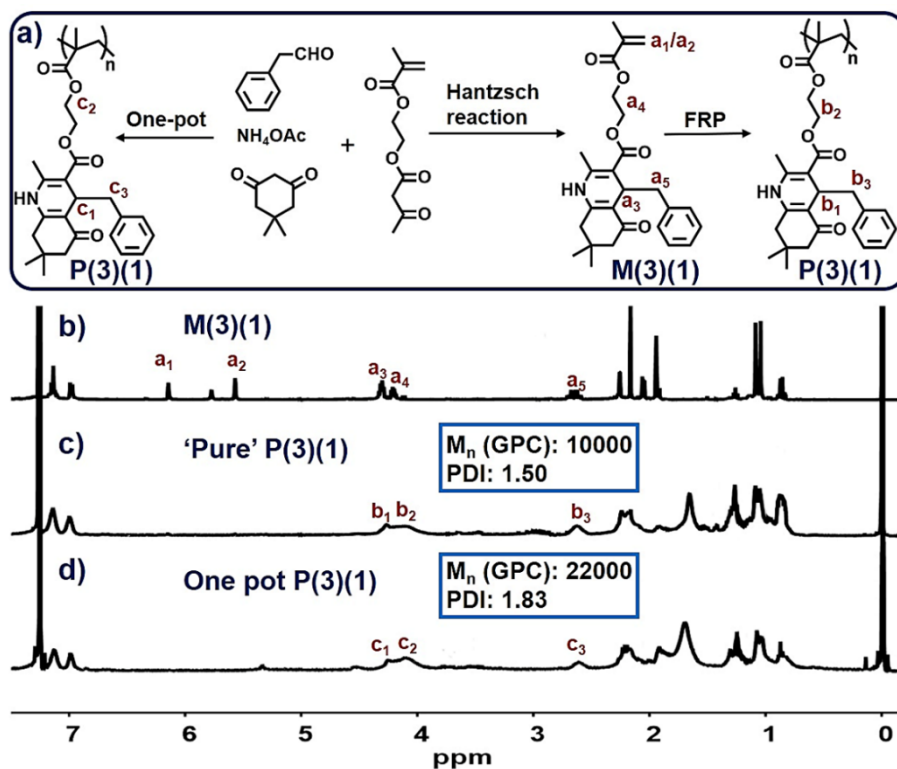

**Figure S9.** a) Preparations of **P(3)(1)** from the traditional monomer–polymer method and one-pot strategy. <sup>1</sup>H NMR spectra (CDCl<sub>3</sub>, 400M) of b) **M(3)(1)**, c) “pure” **P(3)(1)**, and d) **P(3)(1)** *via* the one-pot Hantzsch–FRP method. Related to Figure 1.

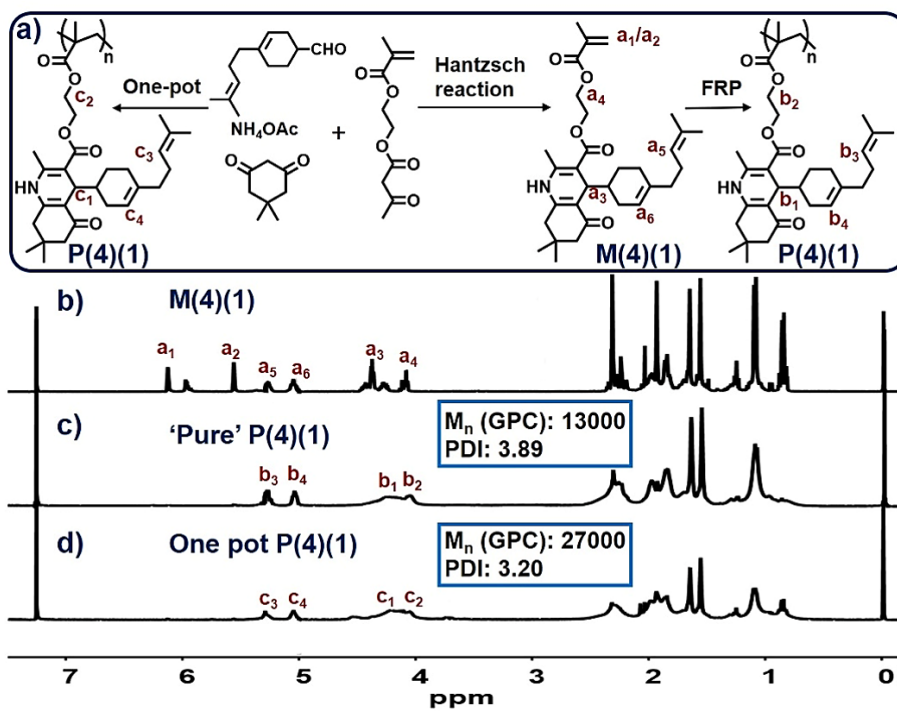

**Figure S10.** a) Preparations of P(4)(1) from the traditional monomer–polymer method and one-pot strategy. <sup>1</sup>H NMR spectra (CDCl<sub>3</sub>, 400M) of b) M(4)(1), c) “pure” P(4)(1), and d) P(4)(1) via the one-pot Hantzsch–FRP method. Related to Figure 1.

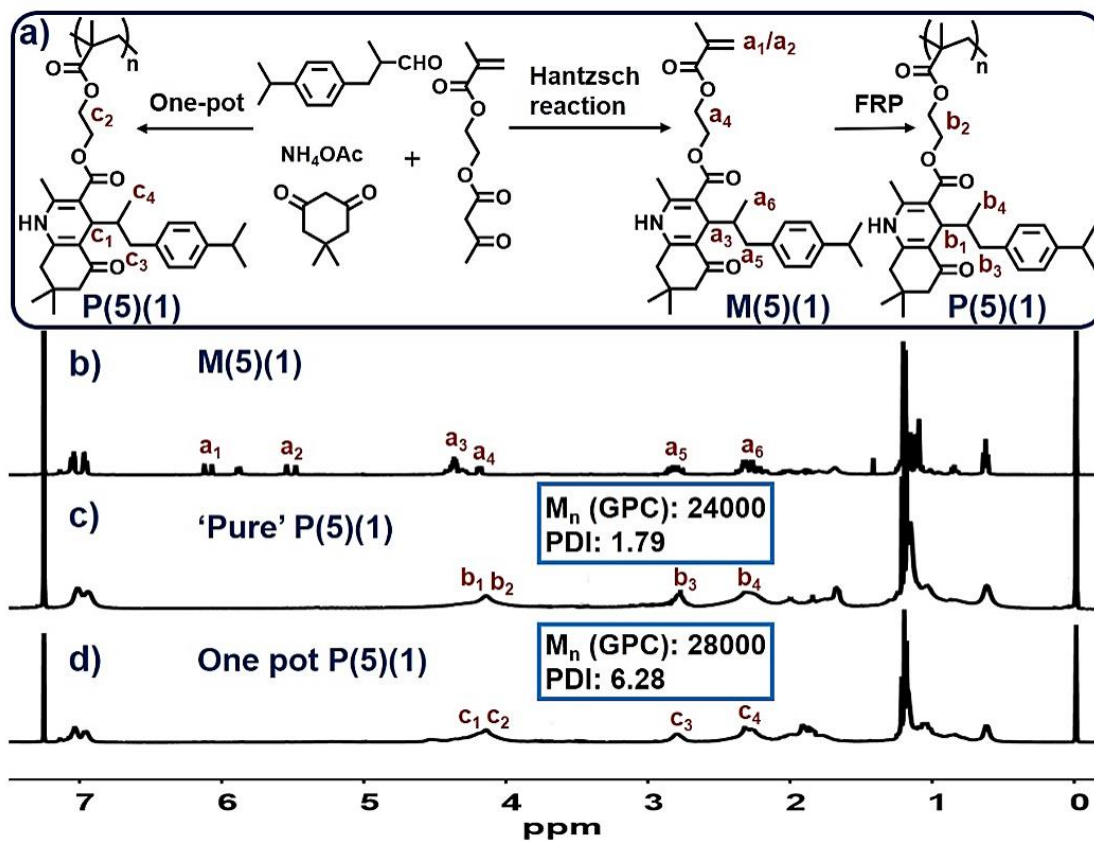

**Figure S11.** a) Preparations of **P(5)(1)** from the traditional monomer–polymer method and one-pot strategy.  $^1\text{H}$  NMR spectra ( $\text{CDCl}_3$ , 400M) of b) **M(5)(1)**, c) “pure” **P(5)(1)**, and d) **P(5)(1)** via the one-pot Hantzsch–FRP method. Related to Figure 1.

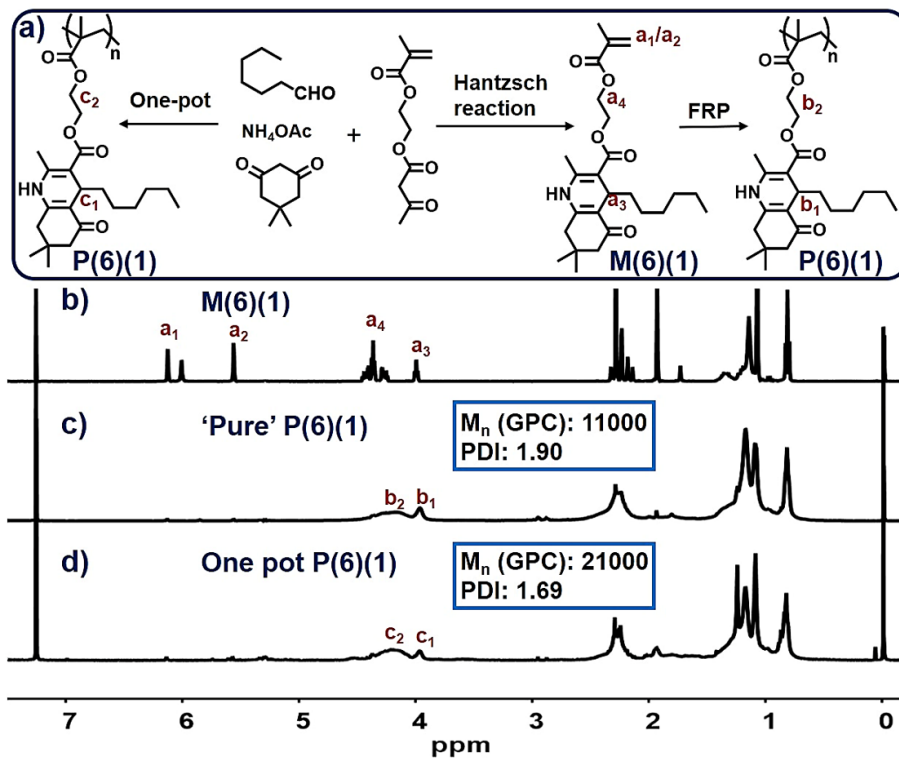

**Figure S12.** a) Preparations of **P(6)(1)** from the traditional monomer–polymer method and the one-pot strategy. <sup>1</sup>H NMR spectra of (CDCl<sub>3</sub>, 400M) of b) **M(6)(1)**, c) “pure” **P(6)(1)**, and d) **P(6)(1)** *via* a one-pot Hantzsch–FRP system. Related to Figure 1.

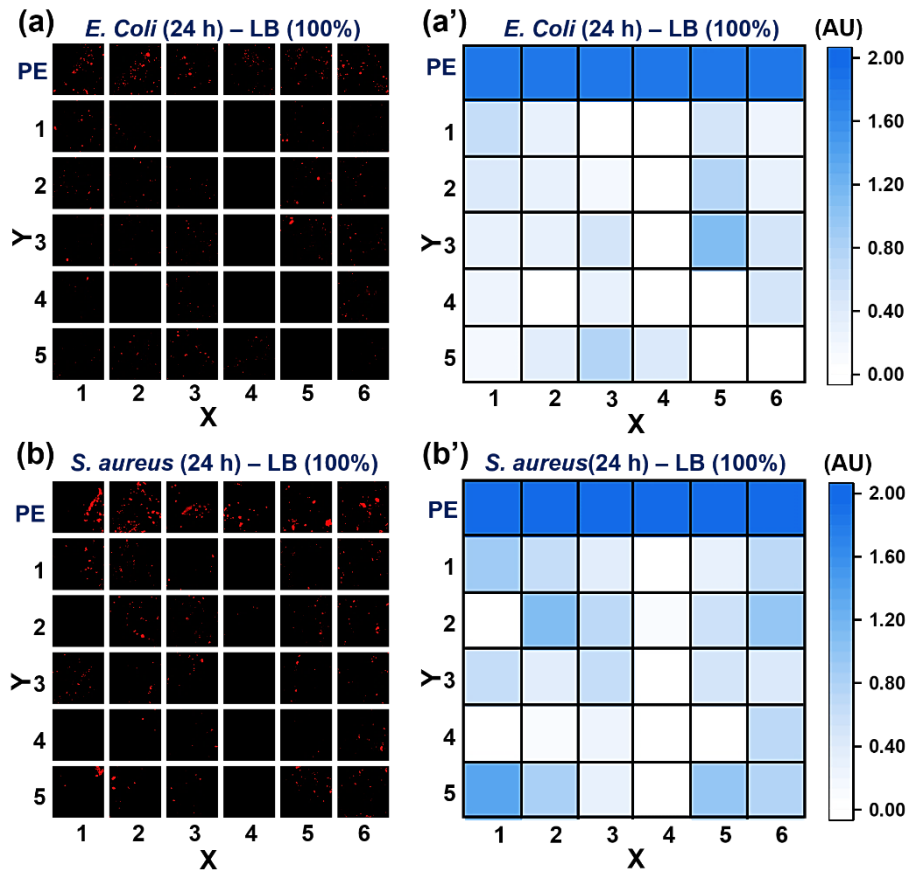

**Figure S13.** a) LSCM images and a') intensity map of *E. coli* on sample disks, 24 h, 100% LB medium. b) LSCM images and b') intensity map of *S. aureus* on sample disks, 24 h, 100% LB medium. Related to Figure 2.

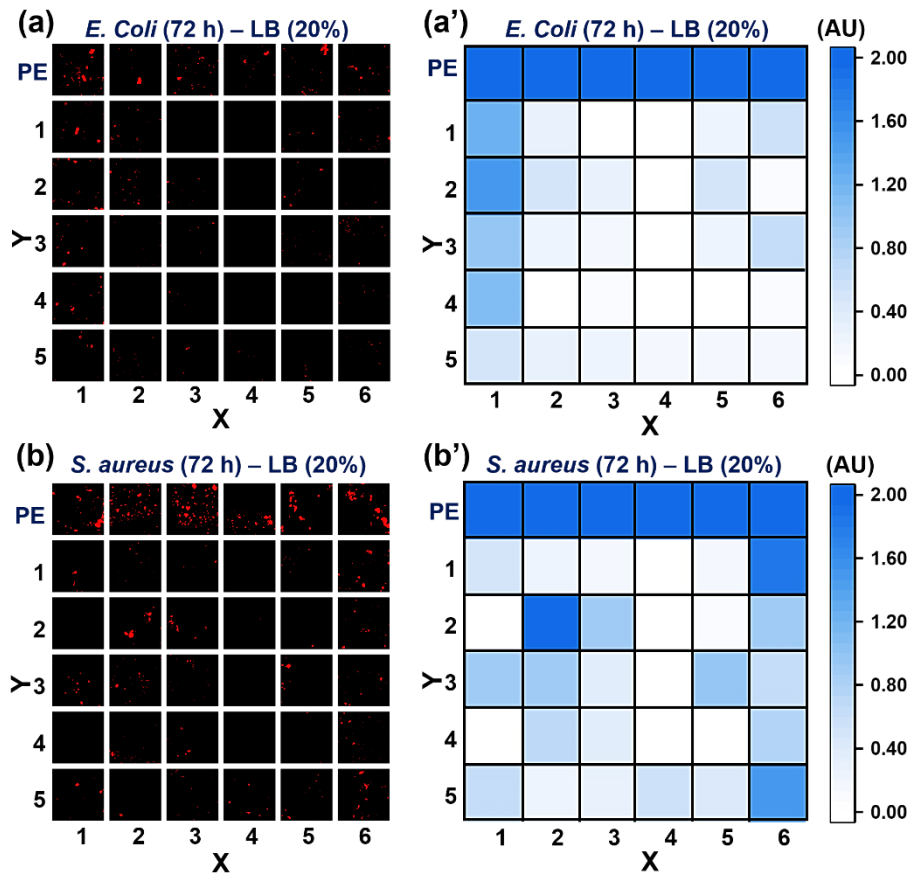

**Figure S14.** a) LSCM images and a') intensity map of *E. coli* on sample disks, 72 h, 20% LB medium. b) LSCM images and b') intensity map of *S. aureus* on sample disks, 72 h, 20% LB medium. Related to Figure 2.

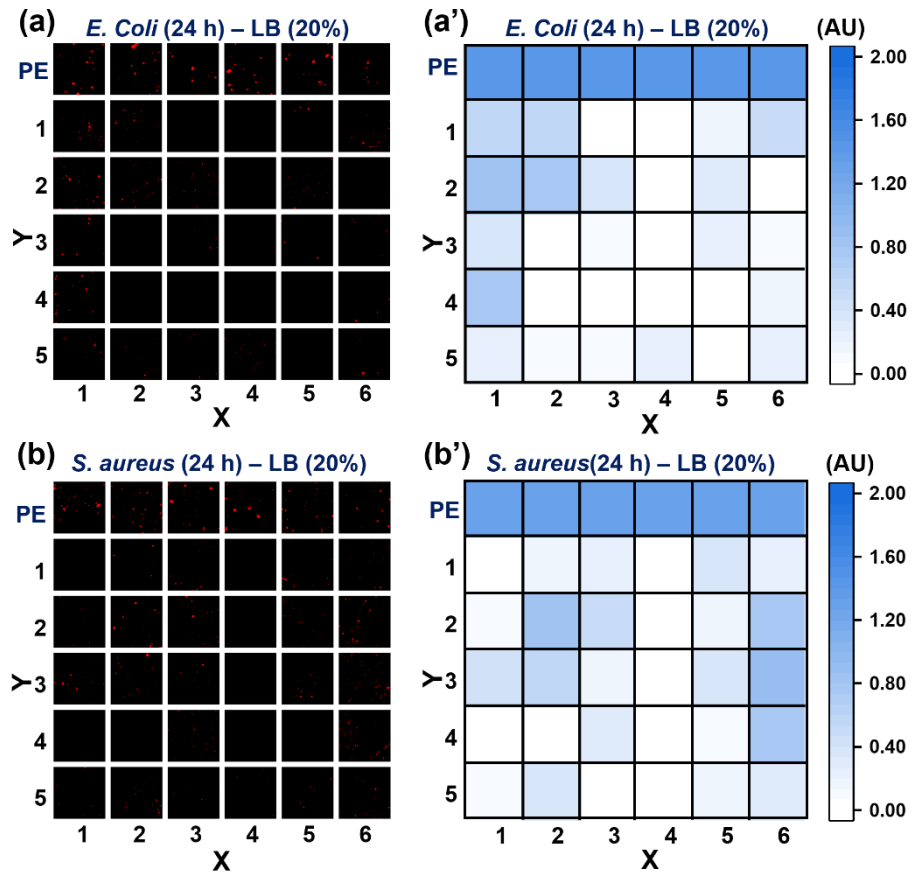

**Figure S15.** a) LSCM images and a') intensity map of *E. coli* on sample disks, 24 h, 20% LB medium. b) LSCM images and b') intensity map of *S. aureus* on sample disks, 24 h, 20% LB medium. Related to Figure 2.



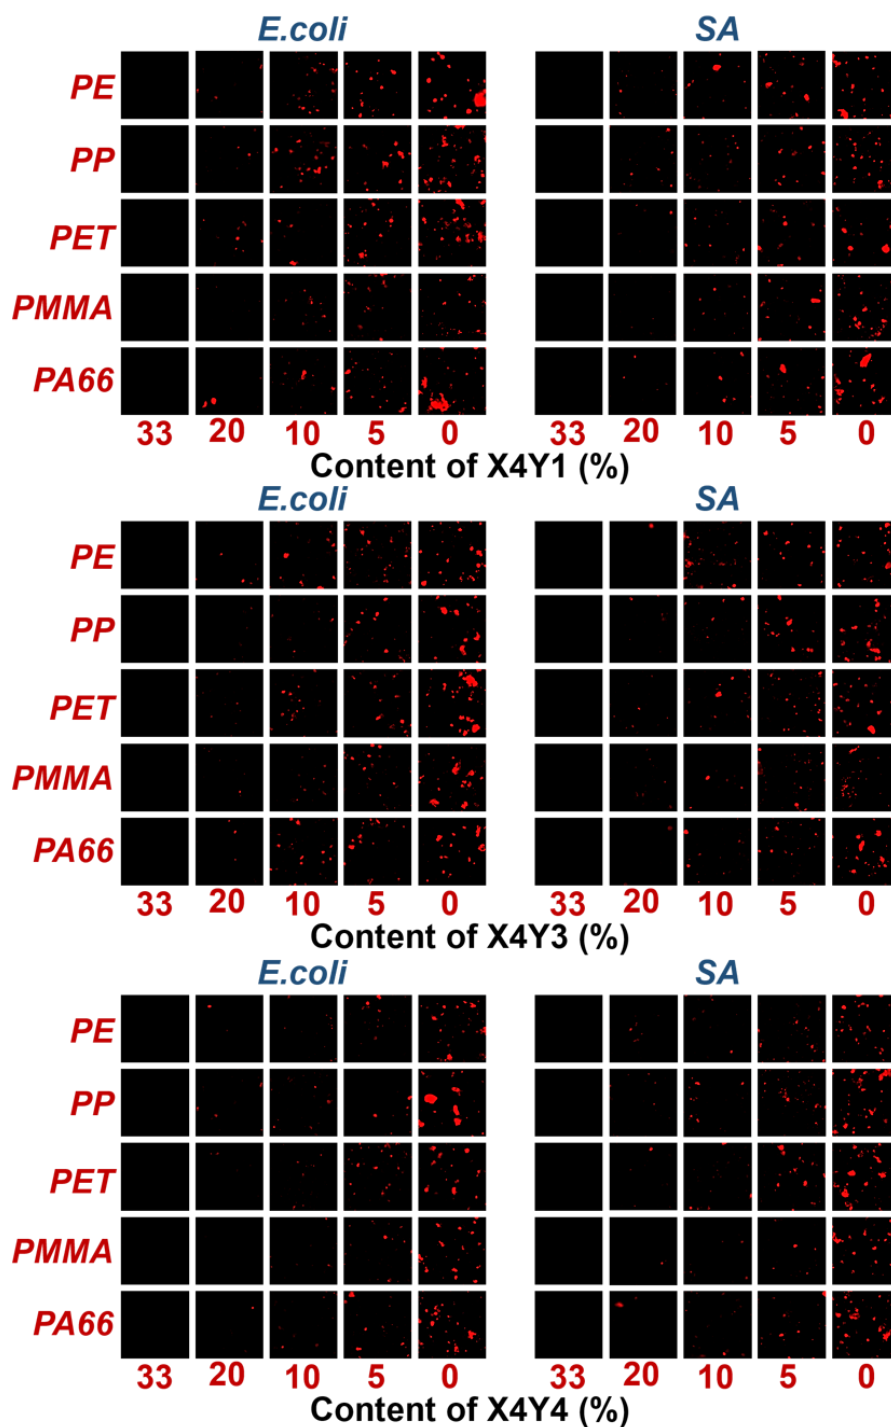

**Figure S16.** LSCM images of bacteria on sample disks after 72-h incubation in 100% LB medium. Three replicate samples were tested, commodity polymers served as the controls. a) Commodity polymers + **P(4)(1)**. b) Commodity polymers + **P(4)(3)**. c) Commodity polymers + **P(4)(4)**. Related to Figure 3.

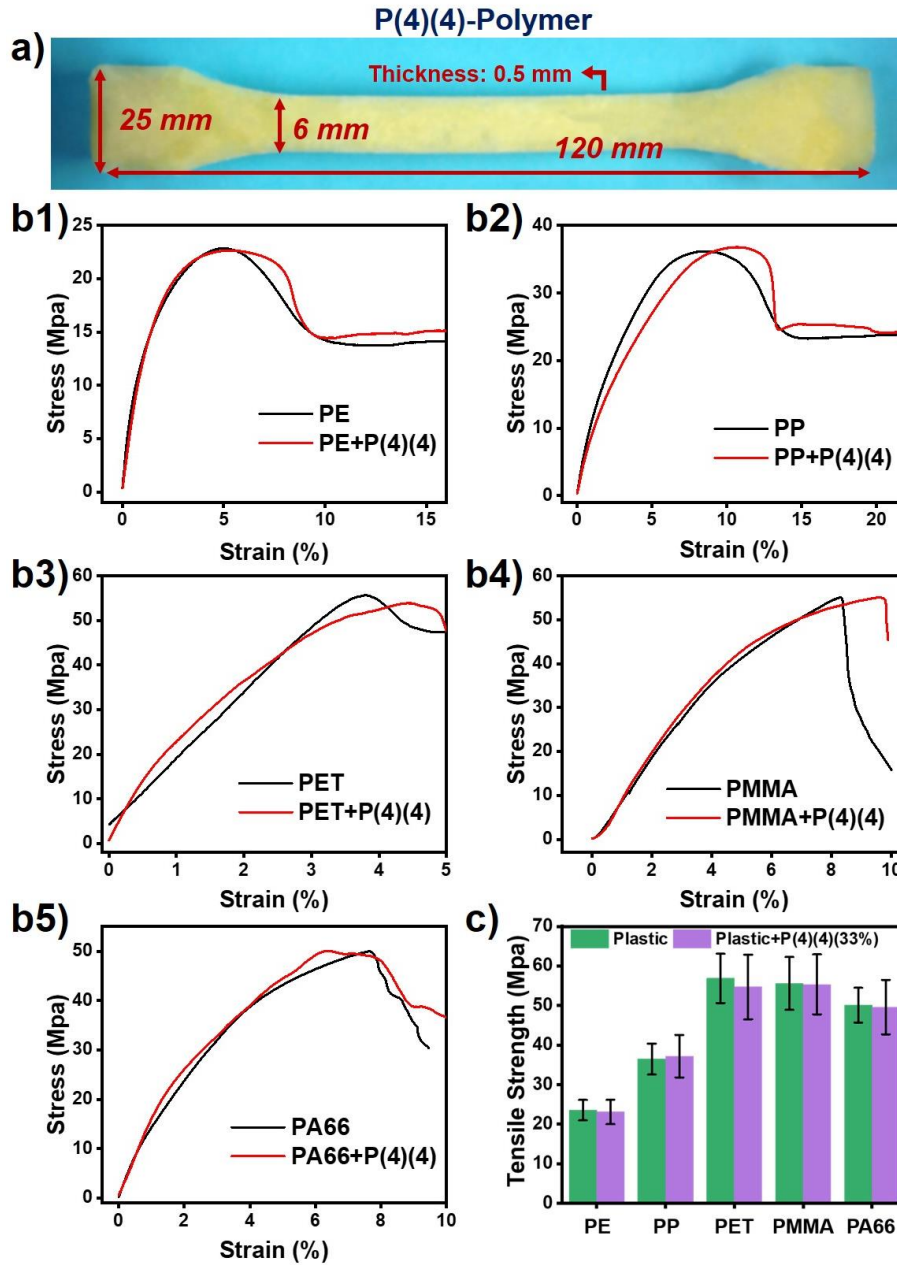

**Figure S17.** a) Typical samples of P(4)(4)-polymers. b1–5) Stress–strain curves of commodity polymers (black) and P(4)(4)-polymer blends (red). c) Tensile strength of commodity polymers and P(4)(4)-polymer blends. Data are represented as mean  $\pm$  SD, n = 6. Related to Figure 4.

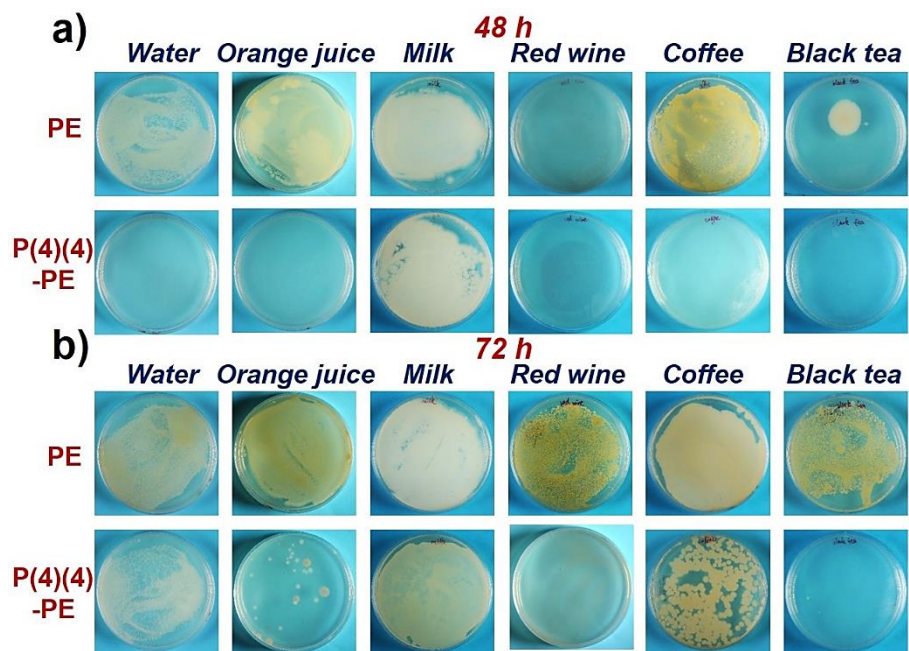

**Figure S18.** Images of the plate-streaking experiment: 100  $\mu$ L sample on LB agar (diameter: 90 mm, thickness: 6 mm, LB: 1.5 g/L), a) 48 h culture, and b) 72 h culture.

Related to Figure 4.

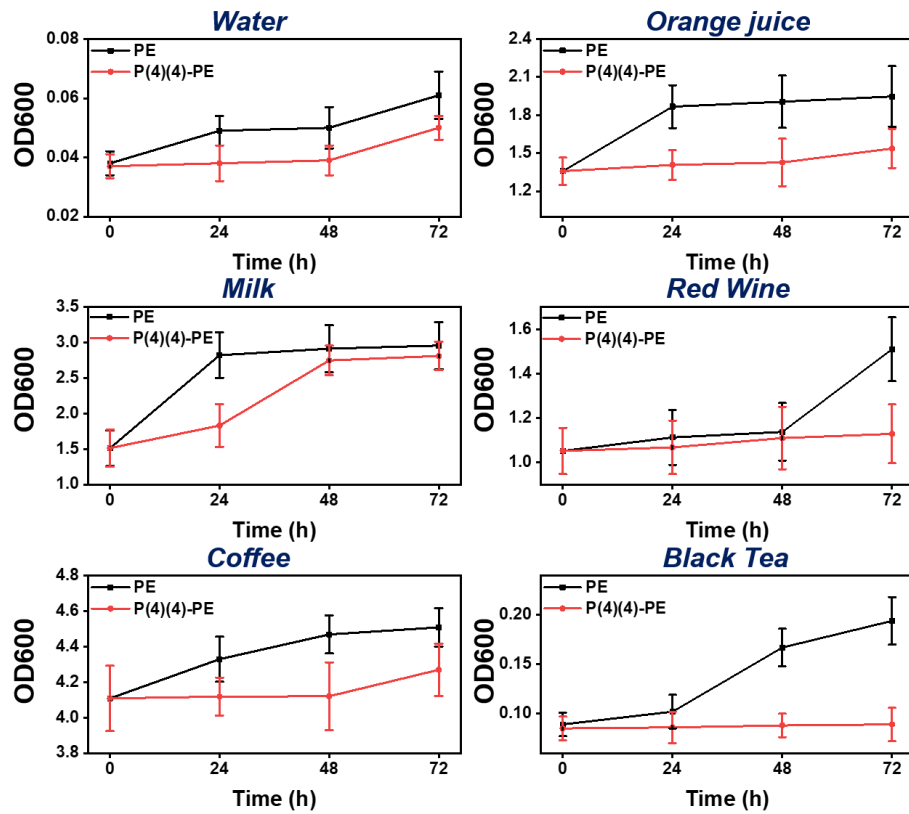

**Figure S19.** OD600 values versus time in the presence of different commercially available beverages. Data are represented as mean  $\pm$  SD,  $n = 5$ . Related to Figure 4.

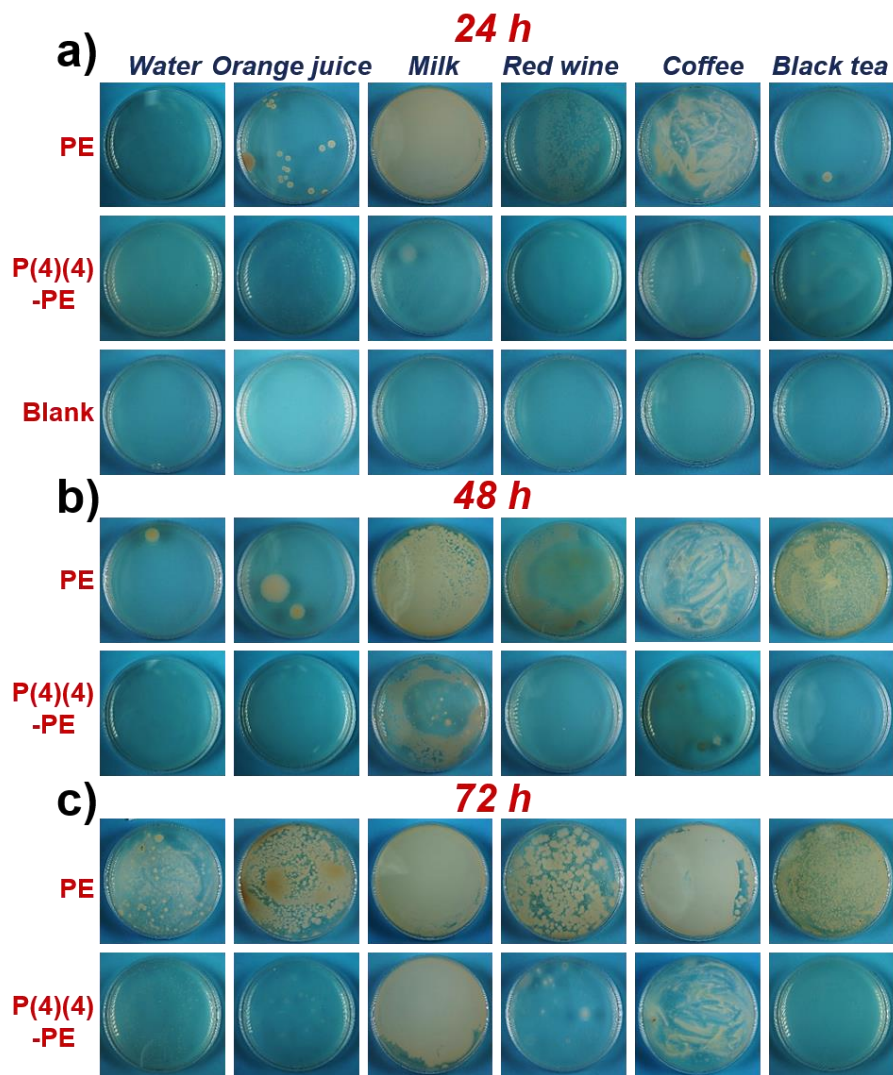

**Figure S20.** Images of the antibacterial capability test of bowls via a standard method.

*S. aureus* was used as a model bacterium, 100  $\mu$ L sample on LB agar (diameter: 90 mm, thickness: 6 mm, LB: 1.5 g/L). a) 24 h culture, b) 48 h culture and c) 72 h culture.

Related to Figure 4.

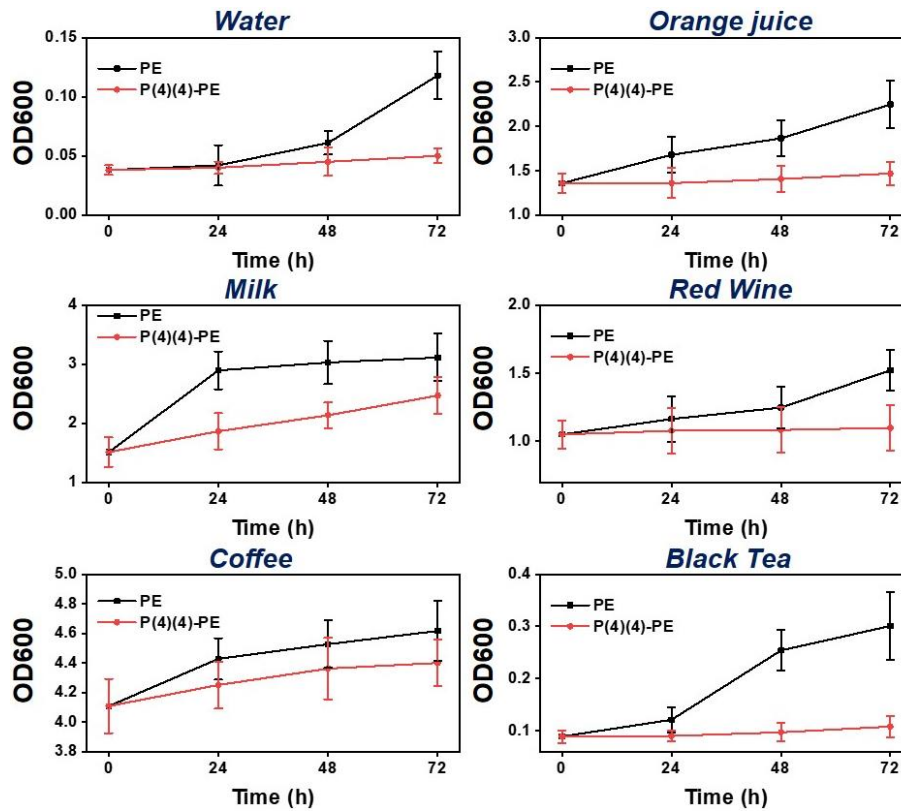

**Figure S21.** OD600 values versus time in the presence of different commercially available beverages in the standard antibacterial capability test of bowls, *S. aureus* was used as a model bacterium. Data are represented as mean  $\pm$  SD, n = 5. Related to Figure 4.

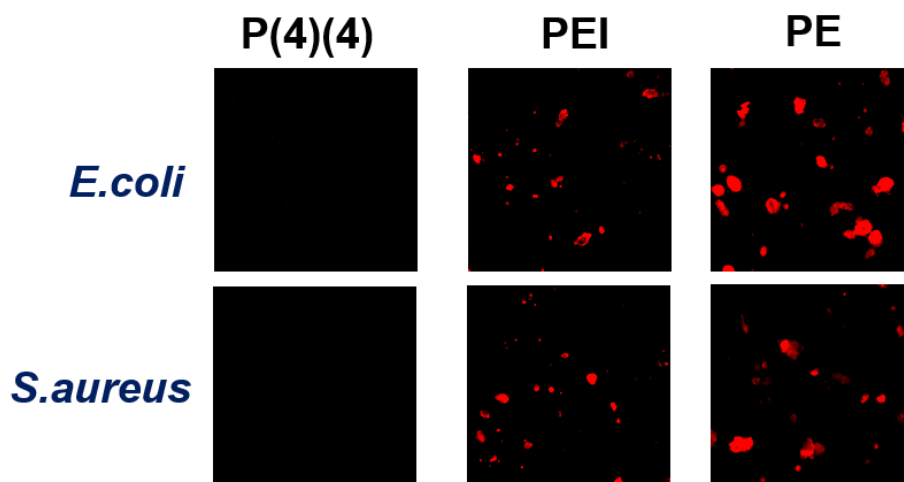

**Figure S22.** LSCM images of *E. coli* and *S. aureus* on sample disks after 72-h incubation. PE served as the control. Each image is  $200 \times 200 \mu\text{m}$ . Related to Figure 5.

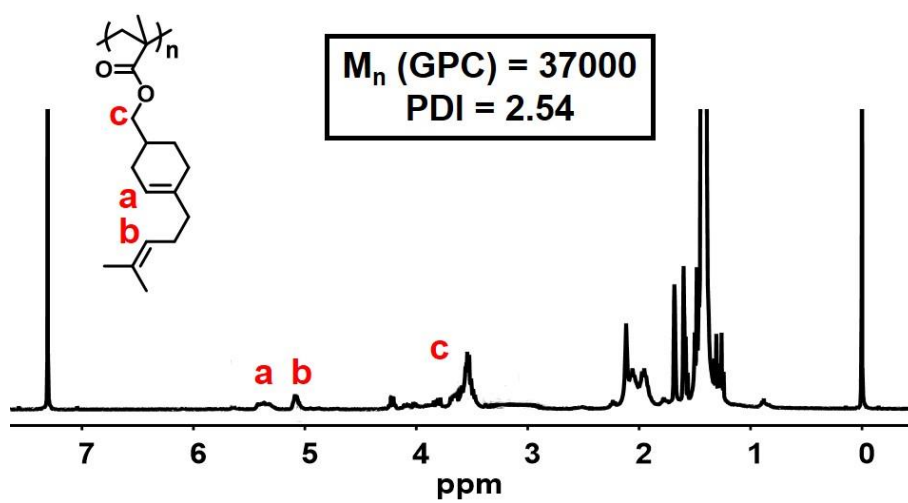

**Figure S23.**  $^1\text{H}$  NMR spectrum ( $\text{CDCl}_3$ , 400M) of **P1**. Related to Figure 6.

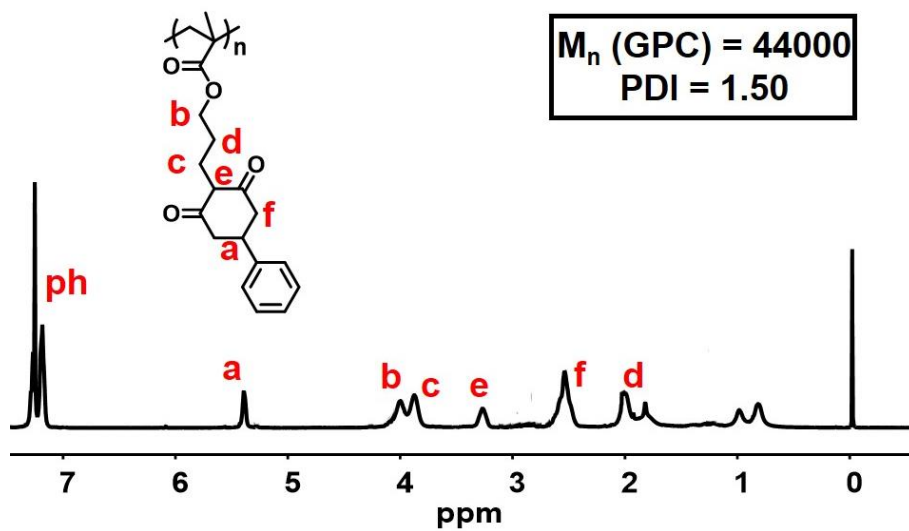

Figure S24.  $^1\text{H}$  NMR spectrum ( $\text{CDCl}_3$ , 400M) of **P2**. Related to Figure 6.

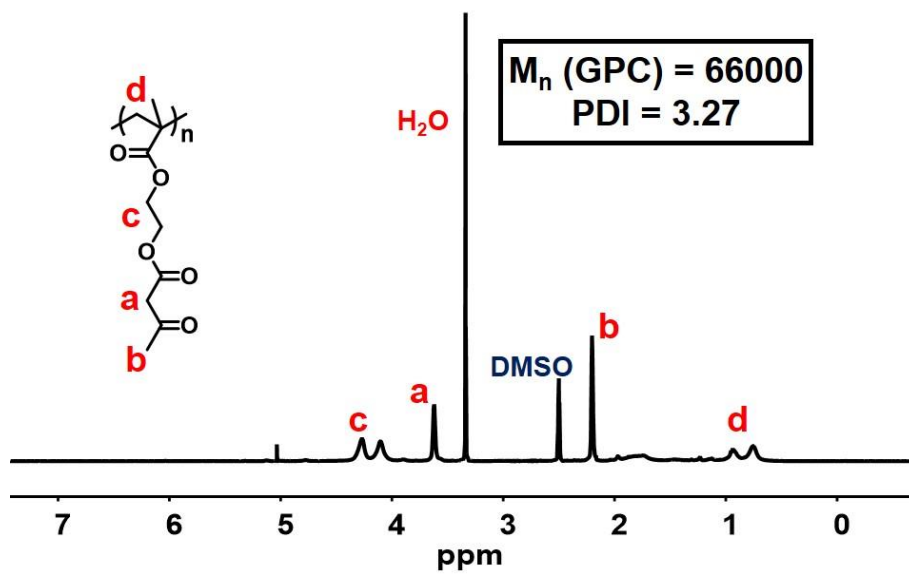

Figure S25.  $^1\text{H}$  NMR spectrum ( $\text{DMSO-}d_6$ , 400M) of P(AEMA). Related to Figure 6.



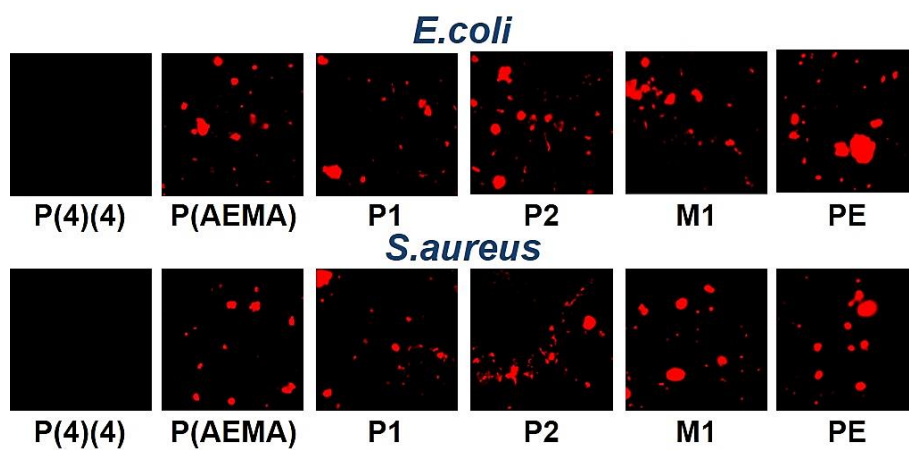

**Figure S26.** LSCM images of *E. coli* and *S. aureus* on sample disks after 72 h incubation. PE served as the control; each image is  $200 \times 200 \mu\text{m}$ . Related to Figure 6.

**Table S1.** The Hantzsch-type polymers (P(X)(Y)). Related to Figure 1.

| Polymer | Conv.(vinyl) <sup>a</sup> | Conv.(Hantzsch) <sup>a</sup> | M <sub>n</sub> <sup>b</sup> | PDI <sup>b</sup> | T <sub>g</sub> <sup>c</sup> (°C) | T <sub>d</sub> <sup>d</sup> (°C) |
|---------|---------------------------|------------------------------|-----------------------------|------------------|----------------------------------|----------------------------------|
| P(1)(1) | 95%                       | 97%                          | 16000                       | 1.64             | 115.4                            | 207                              |
| P(2)(1) | 98%                       | 94%                          | 23000                       | 2.93             | 88.2                             | 252                              |
| P(3)(1) | 98%                       | 98%                          | 22000                       | 1.83             | 102.6                            | 232                              |
| P(4)(1) | 98%                       | 98%                          | 27000                       | 3.20             | 106.8                            | 221                              |
| P(5)(1) | 99%                       | 99%                          | 28000                       | 6.28             | 111.3                            | 227                              |
| P(6)(1) | 99%                       | 98%                          | 21000                       | 1.69             | 121.3                            | 308                              |
| P(1)(2) | 97%                       | 95%                          | 16000                       | 1.39             | 90.6                             | 228                              |
| P(2)(2) | 97%                       | 92%                          | 19000                       | 1.85             | 88.3                             | 263                              |
| P(3)(2) | 97%                       | 93%                          | 23000                       | 1.96             | 98.7                             | 251                              |
| P(4)(2) | 98%                       | 94%                          | 28000                       | 1.35             | 102.9                            | 216                              |
| P(5)(2) | 98%                       | 95%                          | 22000                       | 3.42             | 105.7                            | 226                              |
| P(6)(2) | 99%                       | 98%                          | 19000                       | 1.48             | 85.2                             | 283                              |
| P(1)(3) | 97%                       | 93%                          | 20000                       | 1.48             | 117.2                            | 208                              |
| P(2)(3) | 96%                       | 92%                          | 24000                       | 1.77             | 93.6                             | 256                              |
| P(3)(3) | 98%                       | 93%                          | 23000                       | 2.14             | 105.6                            | 236                              |
| P(4)(3) | 99%                       | 94%                          | 30000                       | 1.37             | 100.0                            | 224                              |
| P(5)(3) | 99%                       | 95%                          | 20000                       | 3.35             | 108.9                            | 267                              |
| P(6)(3) | 98%                       | 98%                          | 22000                       | 1.48             | 103.5                            | 282                              |
| P(1)(4) | 98%                       | 93%                          | 24000                       | 1.26             | 112.6                            | 237                              |
| P(2)(4) | 98%                       | 98%                          | 25000                       | 1.71             | 73.9                             | 292                              |
| P(3)(4) | 98%                       | 98%                          | 26000                       | 1.94             | 97.9                             | 219                              |
| P(4)(4) | 97%                       | 98%                          | 23000                       | 1.83             | 97.1                             | 208                              |
| P(5)(4) | 99%                       | 99%                          | 20000                       | 2.30             | 103.6                            | 268                              |
| P(6)(4) | 99%                       | 99%                          | 26000                       | 1.64             | 101.1                            | 283                              |
| P(1)(5) | 95%                       | 97%                          | 23000                       | 1.47             | 56.6                             | 246                              |
| P(2)(5) | 96%                       | 97%                          | 21000                       | 1.79             | 84.2                             | 250                              |
| P(3)(5) | 97%                       | 96%                          | 24000                       | 2.38             | 112.7                            | 238                              |
| P(4)(5) | 98%                       | 99%                          | 19000                       | 2.07             | 109.6                            | 256                              |
| P(5)(5) | 98%                       | 98%                          | 25000                       | 3.33             | 99.8                             | 259                              |
| P(6)(5) | 99%                       | 99%                          | 21000                       | 1.55             | 96.4                             | 307                              |

a. Calculated by <sup>1</sup>H NMR (CDCl<sub>3</sub>, 400 MHz).

b. Measured by GPC using DMF as the eluent (1 mL/min).

c. Measured by DSC at a scanning rate of 10°C/min.

d. Temperature at weight-loss ratio of 5%, measured by TGA with a heating rate of 20°C/min.

**Table S2.** Concentrations of polymers and M1 on PE surface<sup>a</sup>. Related to Figure 2 and Figure 6.

|    |    | Atom N%<br>(Expected) <sup>b</sup> | Atom N%<br>(Observed) <sup>a</sup> | Concentration on<br>PE surface % | Deviation (%) <sup>c</sup> |
|----|----|------------------------------------|------------------------------------|----------------------------------|----------------------------|
| A1 | B1 | 1.03                               | 1.12                               | 35.88                            | 7.65                       |
|    | B2 | 1.10                               | 1.32                               | 39.61                            | 18.84                      |
|    | B3 | 1.06                               | 0.87                               | 27.08                            | -18.75                     |
|    | B4 | 0.93                               | 1.06                               | 37.61                            | 12.84                      |
|    | B5 | 1.00                               | 1.05                               | 34.65                            | 3.96                       |
| A2 | B1 | 0.99                               | 1.05                               | 35.00                            | 5.01                       |
|    | B2 | 1.05                               | 1.27                               | 39.91                            | 19.74                      |
|    | B3 | 1.02                               | 0.99                               | 32.03                            | -3.90                      |
|    | B4 | 0.89                               | 1.06                               | 39.30                            | 17.91                      |
|    | B5 | 0.96                               | 1.00                               | 34.38                            | 3.15                       |
| A3 | B1 | 1.06                               | 1.14                               | 35.49                            | 6.48                       |
|    | B2 | 1.13                               | 1.21                               | 35.34                            | 6.03                       |
|    | B3 | 1.09                               | 1.24                               | 37.54                            | 12.63                      |
|    | B4 | 0.95                               | 1.05                               | 36.47                            | 9.42                       |
|    | B5 | 1.03                               | 1.01                               | 32.36                            | -2.91                      |
| A4 | B1 | 0.91                               | 0.83                               | 30.10                            | -9.69                      |
|    | B2 | 0.96                               | 1.07                               | 36.78                            | 10.35                      |
|    | B3 | 0.94                               | 1.10                               | 38.62                            | 15.87                      |
|    | B4 | 0.83                               | 0.84                               | 33.40                            | 0.21                       |
|    | B5 | 0.89                               | 1.07                               | 39.67                            | 19.02                      |
| A5 | B1 | 0.91                               | 0.84                               | 30.46                            | -8.61                      |
|    | B2 | 0.97                               | 1.04                               | 35.38                            | 6.15                       |
|    | B3 | 0.94                               | 0.97                               | 34.05                            | 2.16                       |
|    | B4 | 0.83                               | 0.85                               | 33.80                            | 1.41                       |
|    | B5 | 0.89                               | 0.95                               | 35.22                            | 5.67                       |
| A6 | B1 | 1.08                               | 1.04                               | 31.78                            | -4.65                      |
|    | B2 | 1.16                               | 1.25                               | 35.56                            | 6.69                       |
|    | B3 | 1.12                               | 1.13                               | 33.29                            | -0.12                      |
|    | B4 | 0.97                               | 1.10                               | 37.42                            | 12.27                      |
|    | B5 | 1.05                               | 1.07                               | 33.63                            | 0.90                       |
| M1 |    | 0.92                               | 0.82                               | 29.51                            | -11.46                     |

a. Measured by X-ray photoelectron spectroscopy (XPS).

b. Calculated according to the bulk concentration (33%).

c.  $(\text{Concentration on PE surface} - 33)/33 \times 100\%$ .

**Table S3.** The fluorescence intensity of *E. coli* and *S. aureus* on the sample disks<sup>a</sup>. Related to Figure 2.

|           |           | <i>E.coli</i> | A.E.(%) <sup>b</sup> ( <i>E. coli</i> ) | <i>S.aureus</i> | A.E.(%) <sup>b</sup> ( <i>S. aureus</i> ) |
|-----------|-----------|---------------|-----------------------------------------|-----------------|-------------------------------------------|
|           | <b>PE</b> | 3.828±0.653   | 0                                       | 4.386±0.583     | 0                                         |
| <b>A1</b> | <b>B1</b> | 1.528±0.207   | 60.06                                   | 1.034±0.150     | 76.42                                     |
|           | <b>B2</b> | 2.338±0.344   | 38.92                                   | 0.460±0.157     | 89.51                                     |
|           | <b>B3</b> | 2.207±0.281   | 42.35                                   | 2.116±0.271     | 51.76                                     |
|           | <b>B4</b> | 1.042±0.142   | 72.78                                   | 0.004±0.001     | 99.91                                     |
|           | <b>B5</b> | 0.805±0.103   | 78.97                                   | 1.962±0.240     | 55.27                                     |
| <b>A2</b> | <b>B1</b> | 0.790±0.111   | 79.36                                   | 1.703±0.257     | 61.17                                     |
|           | <b>B2</b> | 1.397±0.158   | 63.51                                   | 3.806±0.519     | 13.22                                     |
|           | <b>B3</b> | 0.511±0.086   | 86.65                                   | 1.721±0.251     | 60.78                                     |
|           | <b>B4</b> | 0.244±0.036   | 93.63                                   | 0.816±0.114     | 80.37                                     |
|           | <b>B5</b> | 1.211±0.172   | 68.36                                   | 1.827±0.238     | 58.34                                     |
| <b>A3</b> | <b>B1</b> | 0.248±0.039   | 93.52                                   | 1.896±0.250     | 56.77                                     |
|           | <b>B2</b> | 1.076±0.120   | 71.89                                   | 2.283±0.307     | 47.95                                     |
|           | <b>B3</b> | 1.032±0.130   | 73.04                                   | 2.112±0.271     | 51.85                                     |
|           | <b>B4</b> | 0.532±0.071   | 86.10                                   | 2.968±0.392     | 32.33                                     |
|           | <b>B5</b> | 2.276±0.316   | 40.54                                   | 1.421±0.186     | 67.60                                     |
| <b>A4</b> | <b>B1</b> | 0.004±0.001   | 99.90                                   | 0.004±0.001     | 99.91                                     |
|           | <b>B2</b> | 0.244±0.036   | 93.63                                   | 0.816±0.114     | 80.37                                     |
|           | <b>B3</b> | 0.097±0.019   | 97.47                                   | 0.237±0.032     | 95.60                                     |
|           | <b>B4</b> | 0.002±0.000   | 99.95                                   | 0.004±0.001     | 99.91                                     |
|           | <b>B5</b> | 1.164±0.162   | 69.59                                   | 0.053±0.010     | 98.79                                     |
| <b>A5</b> | <b>B1</b> | 0.786±0.119   | 79.47                                   | 1.311±0.178     | 70.11                                     |
|           | <b>B2</b> | 1.818±0.237   | 52.51                                   | 1.601±0.227     | 63.50                                     |
|           | <b>B3</b> | 1.456±0.207   | 61.96                                   | 2.407±0.312     | 45.12                                     |
|           | <b>B4</b> | 0.142±0.024   | 96.29                                   | 0.427±0.041     | 90.26                                     |
|           | <b>B5</b> | 0.130±0.013   | 96.60                                   | 2.396±0.307     | 45.37                                     |
| <b>A6</b> | <b>B1</b> | 1.157±0.158   | 69.78                                   | 1.182±0.157     | 73.12                                     |
|           | <b>B2</b> | 0.664±0.097   | 82.65                                   | 2.968±0.407     | 32.33                                     |
|           | <b>B3</b> | 0.708±0.109   | 81.50                                   | 2.431±0.327     | 44.57                                     |
|           | <b>B4</b> | 0.711±0.103   | 81.43                                   | 2.270±0.307     | 48.24                                     |
|           | <b>B5</b> | 1.728±0.206   | 54.86                                   | 2.622±0.339     | 40.22                                     |

a. 37°C, 72 h culture.

b. The antibacterial efficiency (A.E.) of polymers, PE served as the control.

**Table S4.** The fluorescence intensity of the bacterial on sample disks<sup>a</sup>. Related to Figure 3.

|                |             | % <sup>b</sup> | <i>E.coli</i> | A.E.(%) <sup>c</sup><br>( <i>E. coli</i> ) | <i>S.aureus</i> | A.E.(%) <sup>c</sup><br>( <i>S. aureus</i> ) |
|----------------|-------------|----------------|---------------|--------------------------------------------|-----------------|----------------------------------------------|
| <b>P(4)(1)</b> | <b>PE</b>   | 33             | 0.004±0.001   | 99.90                                      | 0.004±0.001     | 99.91                                        |
|                |             | 20             | 0.304±0.029   | 92.06                                      | 0.693±0.101     | 84.20                                        |
|                |             | 10             | 2.323±0.347   | 39.32                                      | 0.650±0.089     | 85.18                                        |
|                |             | 5              | 2.130±0.309   | 44.36                                      | 1.418±0.517     | 67.67                                        |
|                |             | 0              | 3.828±0.653   | 0                                          | 4.386±0.583     | 0                                            |
|                | <b>PP</b>   | 33             | 0.010±0.001   | 99.75                                      | 0.003±0.001     | 99.90                                        |
|                |             | 20             | 0.340±0.059   | 91.52                                      | 0.406±0.051     | 86.97                                        |
|                |             | 10             | 1.417±0.199   | 64.65                                      | 1.256±0.189     | 59.69                                        |
|                |             | 5              | 1.555±0.187   | 61.20                                      | 2.080±0.331     | 33.25                                        |
|                |             | 0              | 4.008±0.527   | 0.00                                       | 3.116±0.402     | 0                                            |
|                | <b>PET</b>  | 33             | 0.008±0.001   | 99.77                                      | 0.007±0.001     | 99.78                                        |
|                |             | 20             | 0.599±0.087   | 82.73                                      | 0.232±0.039     | 92.70                                        |
|                |             | 10             | 0.780±0.116   | 77.52                                      | 0.662±0.102     | 79.16                                        |
|                |             | 5              | 2.080±0.287   | 40.04                                      | 1.962±0.379     | 38.22                                        |
|                |             | 0              | 3.469±0.716   | 0                                          | 3.176±0.394     | 0                                            |
|                | <b>PMMA</b> | 33             | 0.011±0.002   | 99.72                                      | 0.009±0.001     | 99.72                                        |
|                |             | 20             | 0.056±0.011   | 98.59                                      | 0.090±0.010     | 97.18                                        |
|                |             | 10             | 0.571±0.071   | 85.66                                      | 0.424±0.057     | 86.71                                        |
|                |             | 5              | 1.481±0.249   | 62.82                                      | 1.681±0.210     | 47.30                                        |
|                |             | 0              | 3.983±0.497   | 0                                          | 3.190±0.422     | 0                                            |
| <b>PA-66</b>   | 33          | 0.009±0.001    | 99.78         | 0.010±0.002                                | 99.75           |                                              |
|                | 20          | 0.840±0.146    | 79.43         | 0.159±0.029                                | 96.03           |                                              |
|                | 10          | 1.061±0.267    | 74.02         | 0.746±0.175                                | 81.37           |                                              |
|                | 5           | 1.654±0.257    | 59.50         | 1.598±0.264                                | 60.09           |                                              |
|                | 0           | 4.084±0.622    | 0             | 4.004±0.517                                | 0               |                                              |
| <b>P(4)(3)</b> | <b>PE</b>   | 33             | 0.002±0.001   | 99.95                                      | 0.004±0.001     | 99.91                                        |
|                |             | 20             | 0.050±0.008   | 98.69                                      | 0.254±0.048     | 94.21                                        |
|                |             | 10             | 0.330±0.069   | 91.38                                      | 0.616±0.089     | 85.96                                        |
|                |             | 5              | 1.601±0.248   | 58.18                                      | 2.010±0.421     | 54.17                                        |
|                |             | 0              | 3.828±0.653   | 0                                          | 4.386±0.583     | 0                                            |
|                | <b>PP</b>   | 33             | 0.007±0.001   | 99.83                                      | 0.003±0.001     | 99.90                                        |
|                |             | 20             | 0.316±0.041   | 92.12                                      | 0.267±0.037     | 91.43                                        |
|                |             | 10             | 1.589±0.308   | 60.35                                      | 1.425±0.245     | 54.27                                        |
|                |             | 5              | 1.973±0.307   | 50.77                                      | 1.737±0.207     | 44.26                                        |
|                |             | 0              | 4.008±0.527   | 0                                          | 3.116±0.402     | 0                                            |
|                | <b>PET</b>  | 33             | 0.015±0.003   | 99.57                                      | 0.007±0.002     | 99.78                                        |
|                |             | 20             | 0.221±0.037   | 93.63                                      | 0.242±0.037     | 92.38                                        |
|                |             | 10             | 1.112±0.200   | 67.94                                      | 1.110±0.145     | 65.05                                        |
|                |             | 5              | 1.549±0.194   | 55.35                                      | 1.447±0.206     | 54.44                                        |
|                |             | 0              | 3.469±0.716   | 0                                          | 3.176±0.394     | 0                                            |
|                | <b>PMMA</b> | 33             | 0.007±0.002   | 99.82                                      | 0.004±0.001     | 99.87                                        |
|                |             | 20             | 0.126±0.027   | 96.84                                      | 0.254±0.038     | 92.04                                        |
|                |             | 10             | 0.362±0.042   | 90.91                                      | 0.426±0.057     | 86.65                                        |
|                |             | 5              | 1.438±0.037   | 63.90                                      | 1.419±0.029     | 55.52                                        |
|                |             | 0              | 3.983±0.497   | 0                                          | 3.190±0.422     | 0                                            |
| <b>PA-66</b>   | 33          | 0.018±0.004    | 99.56         | 0.014±0.003                                | 99.65           |                                              |
|                | 20          | 0.183±0.028    | 95.52         | 0.155±0.028                                | 96.13           |                                              |
|                | 10          | 1.732±0.207    | 57.59         | 0.767±0.107                                | 80.84           |                                              |
|                | 5           | 1.708±0.216    | 58.18         | 1.115±0.270                                | 72.15           |                                              |
|                | 0           | 4.084±0.622    | 0             | 4.004±0.517                                | 0               |                                              |
| <b>P(4)(4)</b> | <b>PE</b>   | 33             | 0.004±0.001   | 99.90                                      | 0.013±0.005     | 99.70                                        |
|                |             | 20             | 0.340±0.049   | 91.12                                      | 0.211±0.049     | 95.19                                        |
|                |             | 10             | 0.491±0.097   | 87.17                                      | 0.695±0.109     | 84.15                                        |
|                |             | 5              | 0.553±0.105   | 85.55                                      | 1.291±0.208     | 70.57                                        |
|                |             | 0              | 3.828±0.653   | 0                                          | 4.386±0.583     | 0                                            |

|              |    |             |       |             |       |
|--------------|----|-------------|-------|-------------|-------|
| <b>PP</b>    | 33 | 0.018±0.004 | 99.55 | 0.028±0.009 | 99.10 |
|              | 20 | 0.157±0.022 | 96.08 | 0.216±0.047 | 93.07 |
|              | 10 | 0.244±0.039 | 93.91 | 0.308±0.044 | 90.12 |
|              | 5  | 0.829±0.100 | 79.32 | 1.122±0.112 | 63.99 |
|              | 0  | 4.008±0.527 | 0     | 3.116±0.402 | 0     |
| <b>PET</b>   | 33 | 0.019±0.002 | 99.45 | 0.005±0.002 | 99.84 |
|              | 20 | 0.083±0.014 | 97.61 | 0.233±0.057 | 92.66 |
|              | 10 | 0.303±0.049 | 91.27 | 0.671±0.094 | 78.87 |
|              | 5  | 1.481±0.027 | 57.31 | 1.462±0.028 | 53.97 |
|              | 0  | 3.469±0.716 | 0     | 3.176±0.394 | 0     |
| <b>PMMA</b>  | 33 | 0.007±0.001 | 99.82 | 0.012±0.003 | 99.62 |
|              | 20 | 0.004±0.001 | 99.90 | 0.077±0.022 | 97.59 |
|              | 10 | 0.193±0.038 | 95.15 | 0.194±0.029 | 93.92 |
|              | 5  | 0.694±0.103 | 82.58 | 0.390±0.062 | 87.77 |
|              | 0  | 3.983±0.497 | 0     | 3.190±0.422 | 0     |
| <b>PA-66</b> | 33 | 0.009±0.001 | 99.78 | 0.007±0.001 | 99.83 |
|              | 20 | 0.095±0.017 | 97.67 | 0.299±0.042 | 92.53 |
|              | 10 | 0.313±0.041 | 92.34 | 0.542±0.071 | 86.46 |
|              | 5  | 1.250±0.203 | 69.39 | 1.055±0.151 | 73.65 |
|              | 0  | 4.084±0.622 | 0     | 4.004±0.517 | 0     |

- 37°C, 72 h culture.
- The ratio of selected polymers (**P(4)(1,3,4)**) added in several typical commodity polymers.
- The antibacterial efficiency (A.E.) of polymers. Commodity polymers served as the controls.

**Table S5.** Interaction between polymers and polysaccharides<sup>a</sup>. Related to Figure 5.

|                | <b>lipopolysaccharide</b> | <b>peptidoglycan</b>    |
|----------------|---------------------------|-------------------------|
| <b>P(4)(4)</b> | 0.10 × 10 <sup>-3</sup>   | 0.14 × 10 <sup>-3</sup> |
| <b>PE</b>      | 0.20 × 10 <sup>-3</sup>   | 0.26 × 10 <sup>-3</sup> |

- Measured by an Octet assay by using a BLI Automated Biosensor.

## Transparent Methods

### EXPERIMENTAL SECTION

#### 1. Materials

All chemicals and solvents were purchased from commercial sources and used without further purification. 2-(Acetoacetoxy)ethyl methacrylate (AEMA, Aladdin, 95%), cinnamic aldehyde (MREDA, 99%), citronellal (MERYER, 99%), hyacinthin (J&K, 97.5%), myrac aldehyde (Energy, 97%), cyclamen aldehyde (MAKLIN, 92%), phellandral (MAKLIN, 97%), 5,5-dimethyl-1,3-cyclohexanedione (MAKLIN, 99%), 1,3-cyclohexanedione (Shaoyuan, 97%), 5-methyl-1,3-cyclohexanedione (NineDing, 98%), 5-phenyl-1,3-cyclohexanedione (Energy, 97%), 5-n-propyl-1,3-cyclohexanedione (Energy, 97%), ammonium acetate (MAKLIN, 98%), glycine (Ouhe, 98%), 2,2'-azobisisoheptonitrile (ABVN, Energy, 98%), polyethylene (PE, 500 mesh, ZhongLian Plastic), polypropylene (PP, 500 mesh, ZhongLian Plastic), polyethylene terephthalate (PET, 500 mesh, ZhongLian Plastic), poly(methyl methacrylate) (PMMA, 500 mesh, ZhongLian Plastic), polyamide 66 (PA66, 500 mesh, ZhongLian Plastic), poly(ethylene imine) (PEI,  $M_w \sim 10000$ , 50 wt/%  $H_2O$ ), 3-bromo-1-propanol (Ark-Pharm, 97%), methacryloylchloride (HEOWNS, 99%), sodium borohydride ( $NaBH_4$ , LanGe, 98%). Drinking natural mineral water (Nongfu Spring), orange juice (NFC), drinking pure milk (Jizhi), red wine (ChangYu), coffee (Nestle), black tea (Oriental leaves).

*Escherichia coli* (*E. coli*), BL21 (competent cell of *E. coli*, Merck Millipore), *Staphylococcus aureus* strain (*S. aureus*, CMCC), pCMV-N-mCherry (Beyotime), Luria-Bertani (LB) broth (Gibco), LB agar (Gibco), tryptic soy broth (TSB, Gibco), tryptic soy agar (TSA, Gibco), kanamycin sulfate (inalco), isopropyl  $\beta$ -D-thiogalactoside (IPTG, inalco), phosphatic buffer solution (PBS, Gibco) were used as purchased.

## 2. Instruments

Gel permeation chromatography (GPC) analyses of polymers were performed using *N, N*-dimethyl formamide (DMF) containing 50 mM LiBr as the eluent. The GPC system is a Shimadzu LC-20AD pump system consisting of an auto injector, a MZ-Gel SDplus 10.0  $\mu\text{m}$  guard column ( $50 \times 8.0$  mm,  $10^2$  Å) followed by two PLgel 5  $\mu\text{m}$  MIXED-D columns ( $300 \times 7.5$  mm), and a Shimadzu RID-10A refractive index detector. The system was calibrated with narrow molecular weight distribution polystyrene standards ranging from 200 to  $10^6$  g mol<sup>-1</sup>.

NMR spectra were obtained using a JEOL JNM-ECA400 spectrometer for all samples. The ESI-MS data were collected using a Micro TOF-QII Bruker. The FT-IR spectra were recorded in a transmission mode on a Perkin-Elmer Spectrum 100 spectrometer (Waltham, MA, USA).

Differential scanning calorimetry (DSC) was performed using a TA instrument Q2000 operated at a scanning rate of 10°C/min. Thermal gravimetric analysis (TGA) was conducted on a TA instrument Q50 with a heating rate of 20°C/min. The fluorescent



images of bacteria were recorded by a Laser scanning Confocal Microscopy (Zeiss LSM 780). Bio-Rad Electroporator was used for the electrotransformation of *E. coli* and *S. aureus*. The tensile shear strength was measured using an MTS SYSTEMS (CHINA) Co. Ltd. SANS CMT6503 electromechanically universal testing machine. Injection molding was performed by a by micro injection molding machine (WZS10D, Shanghai Xinshuo precision instrument co., LTD). X-ray photoelectron spectroscopy (XPS) data were obtained by an ESCALAB 250 Xi electron spectrometer from VG Scientific using 300 W Al K $\alpha$  radiation with a pass energy of 100.0 eV; binding energy of all the elements was calibrated relative to the carbon impurity with a C1s at 284.8 eV. Biosensor experiment was performed by BLI (BioLayer Interferometry) on Octet RED96 (Pall ForteBIO LLC, Fremont, USA).

### 3. Methods

#### 3.1 2-(Methacryloyloxy)ethyl (E)-2,7,7-trimethyl-5-oxo-4-styryl-1,4,5,6,7,8-hexahydroquinoline-3-carboxylate (M(1)(1))

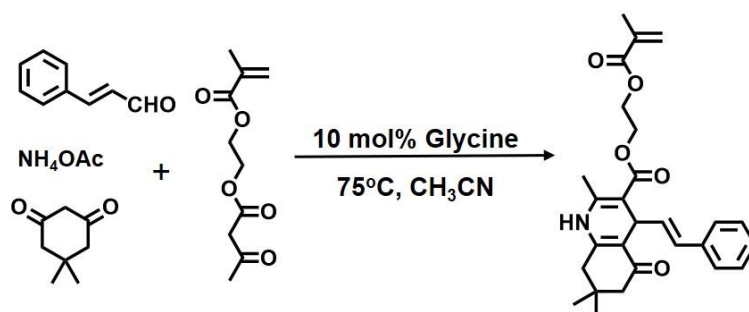

The monomers M(X)(1) were prepared via the Hantzsch reaction by different combinations of aldehydes (A(X)) and 5,5-dimethyl-1,3-cyclohexanedione (B(1)). Typically, A(1) (cinnamaldehyde, 660 mg, 5.0 mmol), AEMA (1.07 g, 5.0 mmol), B(1)

(700 mg, 5.0 mmol), and ammonium acetate (578 mg, 7.5 mmol) were put in a 15-mL centrifuge tube. Then, glycine (38 mg, 0.5 mmol) and acetonitrile (6.0 mL) were added. The mixture was kept in an oil bath (75°C) for 4 h. After removing volatiles under vacuum, the crude was purified by a column chromatography (petroleum ether/ethyl acetate: 5/1) to get monomer M(1)(1) as a yellow powder (1.65 g, yield: 73.6%).

All other monomers were prepared through the same procedure.

<sup>1</sup>H NMR (400 MHz, CDCl<sub>3</sub>, δ/ppm): 7.06-7.29 (m, 5H, ph), 6.20 (s, 1H, CHCH=CH), 6.19 (s, 1H, CHCH=CH), 6.12 (s, 1H, CH<sub>2</sub>=C), 6.06 (s, 1H, NH), 5.57 (s, 1H, CH<sub>2</sub>=C), 4.54 (s, 1H, CCHC), 4.25-4.44 (m, 4H, COOCH<sub>2</sub>CH<sub>2</sub>), 2.36 (s, 2H, CH<sub>2</sub>C=O), 2.09 (s, 3H, NHCCH<sub>3</sub>), 2.00 (s, 3H, CH<sub>3</sub>C=CH<sub>2</sub>), 1.90 (s, 2H, NHCCH<sub>2</sub>), 1.08 (s, 6H, CH<sub>3</sub>CCH<sub>3</sub>).

<sup>13</sup>C NMR (100 MHz, CDCl<sub>3</sub>, δ/ppm): 196.15, 167.70, 167.29, 149.84, 147.27, 145.23, 135.96, 128.02, 127.98, 127.97, 127.96, 127.95, 126.96, 126.95, 126.19, 111.79, 105.18, 62.80, 61.51, 50.93, 40.58, 36.70, 32.70, 29.59, 27.13, 19.29, 18.38.

IR (v/cm<sup>-1</sup>): 3287, 2959, 1716, 1692, 1603, 1488, 1377, 1279, 1214, 1149, 1113, 1082, 1045, 941, 884, 814, 783, 695, 658, 566.

ESI-MS: observed (expected): 450.2286 (450.2280) [M + H<sup>+</sup>].

### **3.2 2-(Methacryloyloxy)ethyl 4-(2,6-dimethylhept-5-en-1-yl)-2,7,7-trimethyl-5-oxo-1,4,5,6,7,8-hexahydroquinoline-3-carboxylate (M(2)(1))**

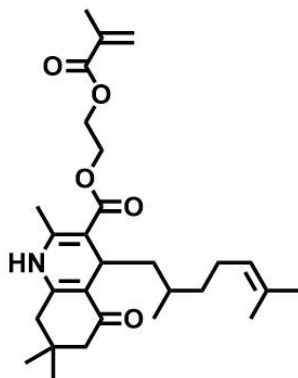

$^1\text{H}$  NMR (400 MHz,  $\text{CDCl}_3$ ,  $\delta/\text{ppm}$ ): 6.12 (s, 1H,  $\text{CH}_2=\text{C}$ ), 5.83 (s, 1H, NH), 5.57 (s, 1H,  $\text{CH}_2=\text{C}$ ), 5.05 (m, 1H,  $\text{CH}=\text{C}(\text{CH}_3)_2$ ), 4.25-4.44 (m, 4H,  $\text{COOCH}_2\text{CH}_2$ ), 4.05 (s, 1H, CCHC), 2.36 (s, 2H,  $\text{CH}_2\text{C}=\text{O}$ ), 2.09 (s, 3H,  $\text{NHCCH}_3$ ), 2.00 (s, 3H,  $\text{CH}_3\text{C}=\text{CH}_2$ ), 1.90 (s, 2H,  $\text{NHCCH}_2$ ), 1.60 (s, 3H,  $\text{CH}=\text{CCH}_3$ ), 1.55 (s, 3H,  $\text{CH}=\text{CCH}_3$ ), 1.25 (m, 7H,  $\text{CH}_2\text{CHCH}_3\text{CH}_2\text{CH}_2$ ), 1.08 (s, 6H,  $\text{CH}_2\text{C}(\text{CH}_3)_2$ ), 0.86 (d, 3H,  $\text{CHCH}_3$ ,  $J = 4.2$  Hz).

$^{13}\text{C}$  NMR (100 MHz,  $\text{CDCl}_3$ ,  $\delta/\text{ppm}$ ): 196.28, 167.70, 167.27, 148.98, 145.00, 136.03, 130.73, 128.93, 126.21, 112.53, 105.74, 62.85, 61.53, 50.98, 44.86, 41.34, 38.32, 37.49, 32.42, 29.85, 27.70, 27.43, 25.81, 25.62, 20.24, 19.51, 18.40, 17.68.

IR ( $\text{v}/\text{cm}^{-1}$ ): 3675, 3285, 2971, 2901, 1719, 1694, 1637, 1604, 1480, 1451, 1405, 1393, 1319, 1241, 1214, 1164, 1075, 1056, 938, 891, 813, 776, 661.

ESI-MS: observed (expected): 472.3061 (472.3063)  $[\text{M} + \text{H}^+]$ .

**3.3 2-(Methacryloyloxy)ethyl 4-benzyl-2,7,7-trimethyl-5-oxo-1,4,5,6,7,8-hexahydroquinoline-3-carboxylate (M(3)(1))**

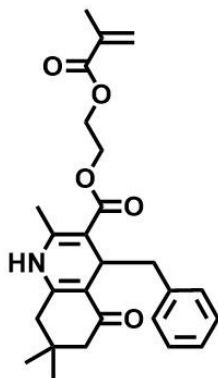

$^1\text{H}$  NMR (400 MHz,  $\text{CDCl}_3$ ,  $\delta/\text{ppm}$ ): 6.95-7.25 (m, 5H, ph), 6.12 (s, 1H,  $\text{CH}_2=\text{C}$ ), 5.76 (s, 1H, NH), 5.57 (s, 1H,  $\text{CH}_2=\text{C}$ ), 4.31 (s, 1H, CCHC), 4.18-4.30 (m, 4H,  $\text{COOCH}_2\text{CH}_2$ ), 2.62 (m, 2H,  $\text{phCH}_2$ ), 2.36 (s, 2H,  $\text{CH}_2\text{C}=\text{O}$ ), 2.09 (s, 3H,  $\text{NHCCH}_3$ ), 2.00 (s, 3H,  $\text{CH}_3\text{C}=\text{CH}_2$ ), 1.90 (s, 2H,  $\text{NHCCH}_2$ ), 1.08 (s, 6H,  $\text{CH}_3\text{CCH}_3$ ).

$^{13}\text{C}$  NMR (100 MHz,  $\text{CDCl}_3$ ,  $\delta/\text{ppm}$ ): 196.08, 167.99, 167.21, 149.74, 145.27, 137.36, 135.94, 131.24, 126.10, 124.50, 120.43, 110.02, 103.37, 62.74, 61.74, 50.94, 41.99, 41.31, 37.53, 34.11, 32.39, 29.85, 27.63, 26.48, 19.45, 17.67.

IR ( $\text{v}/\text{cm}^{-1}$ ): 3675, 3286, 3062, 2959, 1719, 1693, 1603, 1486, 1452, 1383, 1320, 1296, 1279, 1220, 1165, 1106, 1079, 1048, 1004, 941, 814, 753, 699, 595.

ESI-MS: observed (expected): 438.2287 (438.2280)  $[\text{M} + \text{H}^+]$ .

**3.4 2-(Methacryloyloxy)ethyl 2,7,7-trimethyl-4-(4-(4-methylpent-3-en-1-yl)cyclohex-3-en-1-yl)-5-oxo-1,4,5,6,7,8-hexahydroquinoline-3-carboxylate (M(4)(1))**

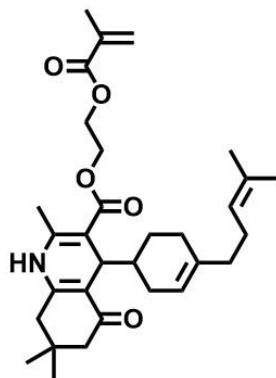

$^1\text{H}$  NMR (400 MHz,  $\text{CDCl}_3$ ,  $\delta/\text{ppm}$ ): 6.12 (s, 1H,  $\text{CH}_2=\text{C}$ ), 5.95 (s, 1H, NH), 5.57 (s, 1H,  $\text{CH}_2=\text{C}$ ), 5.29 (m, 1H,  $\text{CHCH}_2\text{CH}=\text{C}$ ), 5.05 (d, 1H,  $\text{CH}_2\text{CH}_2\text{CH}=\text{C}$ ,  $J = 6.9$  Hz), 4.25-4.44 (m, 4H,  $\text{COOCH}_2\text{CH}_2$ ), 4.12 (s, 1H, CCHC), 2.36 (s, 2H,  $\text{CH}_2\text{C}=\text{O}$ ), 2.09 (s, 3H,  $\text{NHCCH}_3$ ), 2.00 (s, 3H,  $\text{CH}_3\text{C}=\text{CH}_2$ ), 1.95-2.06 (m, 4H,  $\text{CCH}_2\text{CH}_2\text{CH}$ ), 1.70-2.10 (m, 7H,  $\text{CH}_2\text{CHCH}_2\text{CH}_2$ ), 1.90 (s, 2H,  $\text{NHCCH}_2$ ), 1.81 (s, 3H,  $\text{CHCCH}_3$ ), 1.76 (s, 3H,  $\text{CHCCH}_3$ ), 1.08 (s, 6H,  $\text{CH}_3\text{CCH}_3$ ).

$^{13}\text{C}$  NMR (100 MHz,  $\text{CDCl}_3$ ,  $\delta/\text{ppm}$ ): 196.08, 167.80, 167.21, 149.70, 145.27, 137.36, 135.97, 131.24, 126.10, 124.50, 120.43, 110.14, 103.37, 62.74, 61.47, 50.97, 41.99, 41.31, 37.53, 34.11, 32.39, 29.85, 29.23, 27.63, 27.34, 26.48, 25.70, 19.48, 18.30, 18.30, 17.67.

IR ( $\text{v}/\text{cm}^{-1}$ ): 3675, 3281, 2968, 2901, 1720, 1694, 1606, 1483, 1383, 1280, 1214, 1153, 1105, 1076, 1045, 997, 938, 883, 788, 754, 610, 588, 565.

ESI-MS: observed (expected): 510.3224 (510.3219)  $[\text{M} + \text{H}^+]$ .

**3.5 2-(Methacryloyloxy)ethyl 4-(1-(4-isopropylphenyl)propan-2-yl)-2,7,7-trimethyl-5-oxo-1,4,5,6,7,8-hexahydroquinoline-3-carboxylate (M(5)(1))**

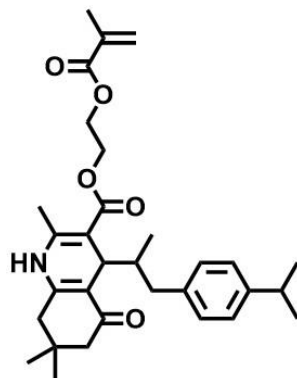

$^1\text{H}$  NMR (400 MHz,  $\text{CDCl}_3$ ,  $\delta/\text{ppm}$ ): 6.95-7.09 (m, 4H, ph), 6.12 (s, 1H,  $\text{CH}_2=\text{C}$ ), 5.89 (s, 1H, NH), 5.57 (s, 1H,  $\text{CH}_2=\text{C}$ ), 4.32-4.44 (m, 4H,  $\text{COOCH}_2\text{CH}_2$ ), 4.19 (s, 1H, CCHC), 2.92 (m, 2H,  $\text{CH}_2\text{ph}$ ), 2.30 (m, 1H, phCH), 2.36 (s, 2H,  $\text{CH}_2\text{C}=\text{O}$ ), 2.09 (s, 3H,  $\text{NHCCCH}_3$ ), 2.00 (s, 3H,  $\text{CH}_3\text{C}=\text{CH}_2$ ), 1.90 (s, 2H,  $\text{NHCCCH}_2$ ), 1.55-1.65 (m, 1H,  $\text{CH}_2\text{CHCH}_3$ ), 1.10 (d, 3H,  $\text{CH}_2\text{CHCH}_3$ ,  $J = 6.5$  Hz), 1.08 (s, 6H,  $\text{CH}_3\text{CCH}_3$ ), 0.67 (d, 6H,  $\text{CH}_3\text{CHCH}_3$ ,  $J = 6.5$  Hz).

$^{13}\text{C}$  NMR (100 MHz,  $\text{CDCl}_3$ ,  $\delta/\text{ppm}$ ): 197.13, 167.23, 164.74, 146.93, 139.16, 137.36, 135.94, 135.41, 129.02, 126.51, 126.07, 125.03, 124.04, 110.04, 103.57, 63.15, 62.36, 51.98, 46.55, 40.24, 33.78, 32.99, 32.40, 30.03, 28.36, 27.19, 25.31, 24.16, 18.37, 17.87, 15.22.

IR ( $\text{v}/\text{cm}^{-1}$ ): 3285, 2958, 1720, 1697, 1604, 1483, 1382, 1275, 1217, 1150, 1113, 1076, 1048, 998, 938, 886, 856, 812, 783, 654, 590, 566, 554.

ESI-MS: observed (expected): 508.3069 (508.3063)  $[\text{M} + \text{H}^+]$ .

**3.6 2-(Methacryloyloxy)ethyl 4-hexyl-2,7,7-trimethyl-5-oxo-1,4,5,6,7,8-hexahydroquinoline-3-carboxylate (M(6)(1))**

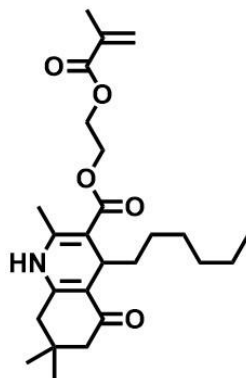

<sup>1</sup>H NMR (400 MHz, CDCl<sub>3</sub>, δ/ppm): 6.12 (s, 1H, CH<sub>2</sub>=C), 6.05 (s, 1H, NH), 5.57 (s, 1H, CH<sub>2</sub>=C), , 4.25-4.44 (m, 4H, COOCH<sub>2</sub>CH<sub>2</sub>), 4.00 (s, 1H, CCHC), 2.36 (s, 2H, CH<sub>2</sub>C=O), 2.09 (s, 3H, NHCCH<sub>3</sub>), 2.00 (s, 3H, CH<sub>3</sub>C=CH<sub>2</sub>), 1.90 (s, 2H, NHCCH<sub>2</sub>), 1.09-1.50 (m, 10H, CH(CH<sub>2</sub>)<sub>5</sub>CH<sub>3</sub>), 1.08 (s, 6H, CH<sub>3</sub>CCH<sub>3</sub>), 0.86 (s, 3H, CH<sub>2</sub>CH<sub>3</sub>).

<sup>13</sup>C NMR (100 MHz, CDCl<sub>3</sub>, δ/ppm): 196.14, 167.62, 167.29, 149.90, 145.38, 136.08, 126.15, 111.33, 104.67, 62.81, 61.47, 51.02, 41.08, 36.34, 32.59, 32.01, 29.84, 29.75, 27.09, 25.01, 22.76, 19.43, 18.36, 14.16, 14.15.

IR (v/cm<sup>-1</sup>): 3281, 2926, 1722, 1693, 1605, 1483, 1386, 1278, 1216, 1163, 1094, 1048, 995, 954, 884, 813, 780, 747, 641, 618, 587, 575, 558.

ESI-MS: observed (expected): 432.2759 (432.2750) [M + H<sup>+</sup>].

### 3.7 Polymerization of M(X)(1) to get P(X)(1)

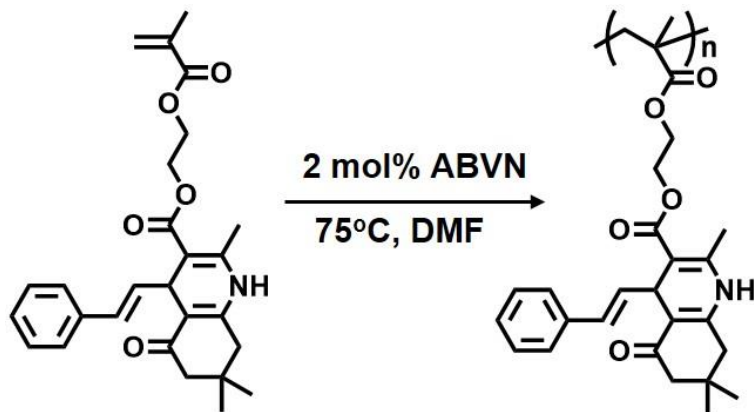

The ‘pure’ polymers P(X)(1) were prepared by radical polymerization of M(X)(1). For example, monomer M(1)(1) (450 mg, 1.0 mmol), 2,2'-azobis-(2,4-dimethylvaleronitrile) (ABVN, 5 mg, 0.02 mmol) were dissolved in dimethyl formamide (DMF, 1.0 mL). The mixture was purged by nitrogen flow for 20 min, then kept in an oil bath (75°C) for 12 h. The polymerization was quenched in an ice–water bath. After precipitation in diethyl ether three times, P(1)(1) was obtained as a yellow powder (400 mg, yield: 88.9%).

All other ‘pure’ polymers were prepared through the same procedure by using different monomers.

### 3.8 HTP-One pot preparation of polymers (P(X)(Y))

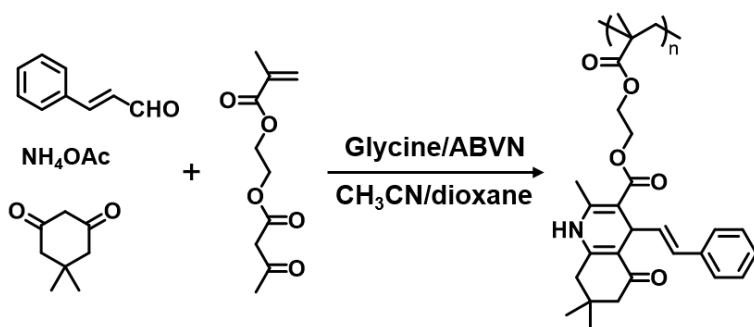



Polymers P(X)(Y) were prepared *via* a one-pot HTP method. For a representative synthesis, A(1) (cinnamaldehyde, 660 mg, 5.0 mmol), AEMA (1.07 g, 5.0 mmol), B(1) (5,5-dimethyl-1,3-cyclohexanedione, 700 mg, 5.0 mmol), and ammonium acetate (578 mg, 7.5 mmol) were charged to a 15-mL centrifuge tube. Then, glycine (38 mg, 0.5 mmol), ABVN (25 mg, 0.1 mmol), and acetonitrile/1,4-dioxane (3.0/3.0 mL) were added. The mixture was purged by bubbling nitrogen for 20 min, then sealed and placed in an oil bath (75°C) for 12 h. The polymerization was quenched in an ice–water bath. A 20–50  $\mu$ L aliquot was taken for  $^1\text{H}$  NMR and GPC analyses. The polymer was purified by precipitation in water followed by re-precipitation from THF with diethyl ether to obtain a yellow powder (P(1)(1) (1.85 g, yield: 82.3%).

All other polymers were simultaneously prepared using the same procedure with the respective A and B starting materials.

### **3.9 Red-fluorescent-protein (RFP) transferred bacteria**

RFP transferred bacteria were prepared according to previous literatures (Nickoloff, 1995). BL21 is a competent cell line of *E. coli*. BL21 cells were transferred to a chilled electroporation cuvette with a precooled plasmid solution (2  $\mu$ L, pCMV-N-mCherry in PBS, 100  $\mu$ g/mL, kanamycin resistance). This cuvette was put in the electroporation instrument for electric shock with an exponential decay pulse (2.5 kV, 200- $\Omega$  resistance, 25- $\mu$ F capacitance, 4.5 ms). Then, LB medium (1 mL) was added to the electroporation cuvette, and the contents were transferred to a 1.5-mL tube for incubation (1.5 h, 180 r/min, 37°C). The mixture was plated on a LB agar plate containing antibiotic

(kanamycin sulfate: 50  $\mu\text{g}/\text{mL}$ ) and incubated at 37°C for 12 h. One small colony was isolated and incubated in 200 mL of LB medium for 2 h. Then, IPTG (200 mM, 2 mL) was added to induce gene expression (28°C, 4 h) to obtain the RFP-*E. coli*.

RFP-*S. aureus* was similarly prepared.

### 3.10 Poly(acetoacetoxy ethyl methacrylate) (P(AEMA))

AEMA (2.14 g, 10 mmol) and ABVN (50 mg, 0.2 mmol) were dissolved in DMF (20 mL) and put in a 50 mL polymerization tube. This tube was sealed with a rubber septum and purged by nitrogen flow for 20 min, and kept in an oil bath (75°C) for 12 h. The polymerization was quenched in an ice–water bath, and the polymer (P(AEMA)) was purified by precipitation in diethyl ether three times as a white powder (1.82 g, yield: 85.0%).

### 3.11 Poly((4-(4-methylpent-3-en-1-yl)cyclohex-3-en-1-yl)methyl methacrylate) (P1)

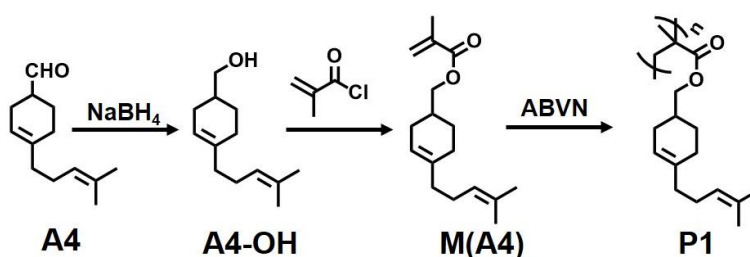

**A4-OH:** Myrac aldehyde (A4, 9.62 g, 50 mmol) and sodium borohydride (NaBH<sub>4</sub>, 2.27 g, 60 mmol) were dissolved in methanol (50 mL), and put in an ice bath for 4 h. After removing volatiles under vacuum, A4-OH was purified by a column chromatography (petroleum ether/ethyl acetate = 10/1) as a colorless oil (8.59 g, 88.4% yield).

$^1\text{H}$  NMR (400 MHz,  $\text{CDCl}_3$ ,  $\delta/\text{ppm}$ ): 5.45 (d, 1H,  $\text{CHCH}_2\text{CH}=\text{C}$ ,  $J = 6.8$  Hz), 5.05 (t, 1H,  $\text{CH}_2\text{CH}_2\text{CH}=\text{C}$ ,  $J = 6.9$  Hz), 3.58 (m, 2H,  $\text{CH}_2\text{OH}$ ), 2.20-2.10 (m, 7H,  $\text{CH}_2\text{CHCH}_2\text{CH}_2$ ), 2.10-2.00 (m, 4H,  $\text{CH}_2\text{CH}_2\text{CH}=\text{C}(\text{CH}_3)_2$ ), 1.85 (s, 3H,  $\text{CH}=\text{CCH}_3\text{CH}_3$ ), 1.82 (s, 3H,  $\text{CH}=\text{CCH}_3\text{CH}_3$ ).

$^{13}\text{C}$  NMR (100 MHz,  $\text{CDCl}_3$ ,  $\delta/\text{ppm}$ ): 137.89, 131.47, 124.44, 119.54, 67.91, 37.79, 36.44, 28.30, 27.88, 26.55, 25.79, 25.75, 17.77.

IR ( $\text{v}/\text{cm}^{-1}$ ): 3324, 2965, 2913, 1670, 1437, 1376, 1261, 1232, 1139, 1087, 1049, 943, 892, 825, 673, 600, 581, 563.

ESI-MS: observed (expected): 195.1757 (195.1749)  $[\text{M} + \text{H}^+]$ .

**M(A4)**: A4-OH (1.94 g, 10 mmol) and trimethylamine (2.0 g, 20 mmol) was solved in  $\text{CH}_2\text{Cl}_2$  (20 mL) followed by adding methacryloyl chloride (1.3 g, 12 mmol) dropwise slowly. The mixture was kept at  $20^\circ\text{C}$  for 6 h. M(A4) was purified by a column chromatography (petroleum ether/ethyl acetate = 10/1) as a colorless oil (1.95 g, 74.4% yield).

$^1\text{H}$  NMR (400 MHz,  $\text{CDCl}_3$ ,  $\delta/\text{ppm}$ ): 6.12 (s, 1H,  $\text{CH}_2=\text{CCH}_3$ ), 5.67 (s, 1H,  $\text{CH}_2=\text{CCH}_3$ ), 5.45 (d, 1H,  $\text{CHCH}_2\text{CH}=\text{C}$ ,  $J = 6.8$  Hz), 5.05 (d, 1H,  $\text{CH}_2\text{CH}_2\text{CH}=\text{C}$ ,  $J = 6.9$  Hz), 3.58 (m, 2H,  $\text{CHCH}_2\text{O}$ ), 2.10-2.20 (m, 7H,  $\text{CH}_2\text{CHCH}_2\text{CH}_2$ ), 2.00-2.10 (m, 4H,  $\text{CH}_2\text{CH}_2\text{CH}=\text{C}$ ), 2.00 (s, 3H,  $\text{CH}_3\text{C}=\text{CH}_2$ ), 1.85 (s, 3H,  $\text{CH}=\text{CCH}_3\text{CH}_3$ ), 1.82 (s, 3H,  $\text{CH}=\text{CCH}_3\text{CH}_3$ ).

$^{13}\text{C}$  NMR (100 MHz,  $\text{CDCl}_3$ ,  $\delta/\text{ppm}$ ): 167.63, 137.82, 136.62, 131.52, 125.32, 124.38, 119.25, 69.01, 37.76, 33.21, 28.45, 27.73, 26.53, 25.87, 25.79, 18.44, 17.77.

IR ( $\nu/\text{cm}^{-1}$ ): 3676, 2967, 2914, 1718, 1638, 1452, 1403, 1376, 1320, 1296, 1104, 1066, 1049, 1013, 984, 937, 813, 760, 726, 683, 580.

ESI-MS: observed (expected): 285.1839 (285.1831)  $[\text{M} + \text{Na}^+]$ .

**P1:** M(A4) (2.62 g, 10 mmol) and ABVN (50 mg, 0.1 mmol) were dissolved in DMF (20 mL). The mixture was purged by nitrogen flow for 20 min, and kept in an oil bath (75°C) for 12 h. The polymerization was quenched in an ice–water bath, and P1 was precipitated in diethyl ether three times as a white powder (2.08 g, 79.4% yield).

### 3.12 Poly(3-(2,6-dioxo-4-phenylcyclohexyl)propyl methacrylate) (P2)

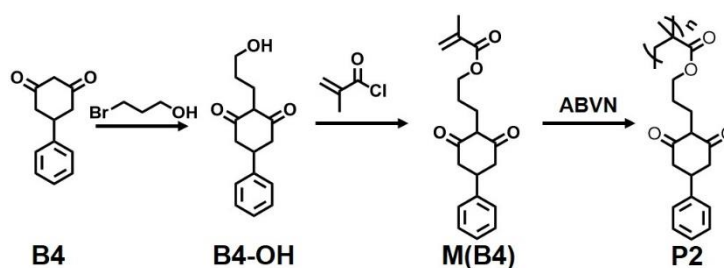

**B4-OH:** 5-Phenyl-1,3-cyclohexanedione (B4, 9.40 g, 50 mmol), potassium iodide (KI, 10 g, 60 mmol), potassium carbonate ( $\text{K}_2\text{CO}_3$ , 13.8 g, 50 mmol) and 3-bromo-1-propanol (6.9 g, 50 mmol) were dissolved in acetone (50 mL). This solution was refluxed for 12 h. After removing acetone under vacuum, B4-OH was purified by a column chromatography (petroleum ether/ethyl acetate = 5/1) as a colorless oil (8.86 g, 72.1% yield).

$^1\text{H}$  NMR (400 MHz,  $\text{CDCl}_3$ ,  $\delta/\text{ppm}$ ): 7.10-7.45 (m, 5H, ph), 5.48 (s, 1H,  $\text{CH}_2\text{OH}$ ), 4.06 (m, 2H,  $\text{CH}_2\text{OH}$ ), 3.92 (m, 1H, CCHC), 3.41 (t, 1H,  $\text{CH}_2\text{CHCH}_2$ ,  $J = 5.2$  Hz), 2.62 (m, 4H,  $\text{CH}_2\text{CHCH}_2$ ), 2.60 (m, 2H,  $\text{CHCH}_2\text{CH}_2$ ), 2.00 (m, 2H,  $\text{CH}_2\text{CH}_2\text{OH}$ ).

$^{13}\text{C}$  NMR (100 MHz,  $\text{CDCl}_3$ ,  $\delta/\text{ppm}$ ): 199.18, 199.18, 142.70, 128.90, 128.90, 127.17, 126.77, 126.77, 67.75, 62.27, 43.91, 43.91, 39.43, 36.71, 31.50.

IR ( $\text{v}/\text{cm}^{-1}$ ): 3403, 3029, 2944, 1717, 1598, 1497, 1465, 1453, 1399, 1374, 1352, 1265, 1231, 1209, 1139, 1089, 1061, 1000, 968, 868, 825, 760, 733, 699, 657, 615, 600.

ESI-MS: observed (expected): 247.1339 (247.1334)  $[\text{M} + \text{H}^+]$ .

**M(B4)**: B4-OH (2.5 g, 10 mmol) and trimethylamine (2.0 g, 20 mmol) were solved in  $\text{CH}_2\text{Cl}_2$  (25 mL). Methacryloyl chloride (1.3 g, 12 mmol) was added dropwise slowly. The mixture was kept at  $25^\circ\text{C}$  for 1 h. After removing the white solid by filtration and the volatiles under vacuum, M(B4) was purified by a column chromatography (petroleum ether/ethyl acetate = 5/1) as a colorless oil (2.67 g, 85.1% yield).

$^1\text{H}$  NMR (400 MHz,  $\text{CDCl}_3$ ,  $\delta/\text{ppm}$ ): 7.10-7.45 (m, 5H, ph), 6.12 (s, 1H,  $\text{CH}_2=\text{C}$ ), 5.57 (s, 1H,  $\text{CH}_2=\text{C}$ ), 4.21 (t, 2H,  $\text{CH}_2\text{O}$ ,  $J = 6.2$  Hz), 4.02 (m, 1H, CCHC), 3.41 (t, 1H,  $\text{CH}_2\text{CHCH}_2$ ,  $J = 6.7$  Hz), 2.62 (m, 4H,  $\text{CH}_2\text{CHCH}_2$ ), 2.60 (m, 2H,  $\text{CHCH}_2\text{CH}_2$ ), 2.00 (m, 2H,  $\text{CH}_2\text{CH}_2\text{CH}_2$ ), 1.98 (s, 3H,  $\text{CH}_2=\text{CCH}_3$ ).

$^{13}\text{C}$  NMR (100 MHz,  $\text{CDCl}_3$ ,  $\delta/\text{ppm}$ ): 198.93, 176.91, 167.34, 142.68, 136.19, 128.90, 128.90, 127.16, 126.77, 126.77, 125.91, 102.80, 65.38, 61.08, 43.91, 39.40, 36.60, 28.06, 18.40.

IR ( $\text{v}/\text{cm}^{-1}$ ): 3675, 2958, 2901, 1716, 1654, 1602, 1497, 1469, 1454, 1428, 1403, 1374, 1351, 1318, 1296, 1257, 1231, 1207, 1161, 1044, 1007, 975, 940, 910, 869, 816, 760, 733, 699, 656, 613, 588.

ESI-MS: observed (expected): 337.1422 (337.1416) [M + Na<sup>+</sup>].

**P2:** M(B4) (1.57 g, 10 mmol) and ABVN (50 mg, 0.2 mmol) were dissolved in DMF (20 mL). This solution was purged by nitrogen flow for 20 min, then kept in an oil bath (75°C) for 12 h. The polymerization was quenched in an ice–water bath. P2 was purified by precipitation in diethyl ether three times as a white powder (1.37 g, 87.3% yield).

### 3.13 Ethyl 2-methyl-4-(4-(4-methylpent-3-en-1-yl)cyclohex-3-en-1-yl)-5-oxo-7-phenyl-1,4,5,6,7,8-hexahydroquinoline-3-carboxylate (M1)

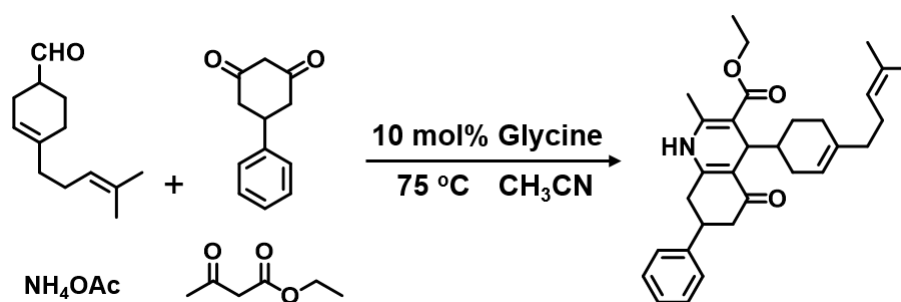

Myrac aldehyde (A(4), 1.92 g, 10 mmol), ethyl acetoacetate (1.30 g, 10 mmol), 5-phenyl-1,3-cyclohexanedione (B(4), 1.89 g, 10 mmol), and ammonium acetate (1.16 g, 15 mmol) were put in a 15-mL centrifuge tube. Then, glycine (76 mg, 1 mmol) and acetonitrile (9.0 mL) were added. The mixture was kept in an oil bath (75°C) for 4 h. Acetonitrile was removed under vacuum, and the crude was purified by a column chromatography (petroleum ether/ethyl acetate: 5/1) to get M1 as a yellow oil (3.86 g, yield: 81.6%).

<sup>1</sup>H NMR (400 MHz, CDCl<sub>3</sub>, δ/ppm): 7.10-7.33 (m, 5H, ph), 6.08 (s, 1H, NH), 5.29 (s, 1H, CHCH<sub>2</sub>CH=C), 5.09 (s, 1H, CH<sub>2</sub>CH<sub>2</sub>CH=C), 4.13 (m, 2H, CH<sub>2</sub>O), 4.12 (s, 1H,

CCHC), 3.51 (m, 1H, phCH), 2.36 (m, 2H, CH<sub>2</sub>C=O), 2.09 (s, 3H, NHCCH<sub>3</sub>), 1.90 (s, 2H, NHCCH<sub>2</sub>), 1.95-2.06 (m, 4H, CCH<sub>2</sub>CH<sub>2</sub>CH), 1.70-2.10 (m, 7H, CH<sub>2</sub>CHCH<sub>2</sub>CH<sub>2</sub>), 1.81 (s, 3H, CHCCH<sub>3</sub>), 1.76 (s, 3H, CHCCH<sub>3</sub>), 1.17 (m, 3H, CH<sub>3</sub>CH<sub>2</sub>O).

<sup>13</sup>C NMR (100 MHz, CDCl<sub>3</sub>, δ/ppm): 195.62, 168.44, 150.57, 144.00, 142.64, 137.34, 131.33, 128.79, 128.79, 127.05, 126.84, 126.84, 124.61, 120.49, 111.40, 104.00, 59.88, 43.78, 41.97, 41.57, 39.58, 37.64, 34.90, 34.55, 29.32, 27.68, 26.63, 25.80, 19.36, 17.78, 14.49.

IR (v/cm<sup>-1</sup>): 3288, 2980, 2908, 1738, 1696, 1641, 1605, 1485, 1449, 1372, 1236, 1215, 1157, 1105, 1070, 1045, 937, 915, 846, 786, 762, 699, 634, 607, 560.

ESI-MS: observed (expected): 474.3015 (474.3008) [M + H<sup>+</sup>].

### 3.14 HTP measurements of the antibacterial ability of polymers

**Preliminary screening:** As a typically example, P(1)(1) (1.5 g) and PE powder (3.0 g) were mixed and grinded evenly in a mortar. The mixture was manufactured to a square membrane (40 × 40 mm, thickness: 0.5 mm) by the hot-press technology under 150°C. Then, P(1)(1)-PE discs (diameter: 5 mm) were prepared by using a puncher. Other P(X)(Y)-PE samples were similarly prepared.

All P(X)(Y)-PE samples were attached on glass slides (25 mm × 75 mm × 1 mm) to get mini-arrays (10 samples/piece). These mini-arrays were used to test the antibacterial ability of P(X)(Y) with PE as the control. Briefly, these polymer mini-arrays were sterilized by a 75% ethanol aqueous solution and UV light (254 nm, 40 w, 30 min), then put into a Luria-Bertani (LB) broth (200 mL) followed by addition of a

suspension of planktonic *E. coli* or *S. aureus* (10  $\mu$ L). The optical density of this suspension at UV~600 nm (OD600) is approximately 1.0. The polymer arrays were incubated with bacteria for 72 h followed by washing twice with water and fixation with paraformaldehyde (4%) prior to observation by laser scanning confocal microscopy (LSCM, excitation wavelength: 543 nm; emission wavelength: 566–719 nm).

**Secondary screening:** P(X)(Y)-polymer samples were prepared by abovementioned method. These samples were attached on glass slides for antibacterial test as abovementioned. Commodity polymers (PE, PP, PET, PMMA, PA-66) were used as the controls.

Antibacterial capabilities of all other polymers and small molecules (PEI, P(AEMA), P1, P2, and M1) were similarly tested through the polymer-array method.

### **3.15 Mechanical properties of P(4)(4)-polymer samples**

The tensile shear strength of P(4)(4)-polymer samples were tested according to the national standard method (GBT 1040.3-2006). As a typical example, P(4)(4) (5 g) was mixed with PE (10 g) to prepare dumbbell-shaped splines by hot pressing. The dumbbell-shaped splines were in agreement with the national standard (length: 120 mm, breadth: 25 mm, thickness: 0.5 mm; length of narrow part: 25 mm, breadth of narrow part: 6 mm, thickness of narrow part: 0.5 mm). These splines were tested by an MTS SYSTEMS (CHINA) Co. Ltd. SANS CMT6503 electromechanically universal testing machine (tensile speed: 5 mm/min; 25°C).



All other P(4)(4)-polymer splines were prepared and tested through the same procedure. General polymers were used as the controls. The data are presented as mean  $\pm$  SD (n = 6).

### **3.16 Injection molding for plastic bowls**

The plastic bowls were produced by injection molding technology. Typically, the uniform mixture of P(4)(4)-PE (33 wt.% of P(4)(4), 3 g) was added to the machine and heated (150 °C, 2 minutes) to melt-down. Then, the molten polymer was injected into a mold for bowl (0.6 Mpa, 1 minute) followed by keeping at 25°C (normal atmosphere, 10 minutes) to get a plastic P(4)(4)-PE bowl.

The PE bowls were prepared through the same procedure.

### **3.17 Antibacterial capability of bowls**

The antibacterial capability of bowls has been characterized according to a standard method (QB/T2591-2003). Briefly, bowls were sterilized by a 75% ethanol aqueous solution, and incubated with a suspension of *S. aureus* in LB medium (5 mL, OD600 = 1.0) for 24 h at 37°C. Then, these bowls were washed with sterilized PBS for 10 times prior to addition of different beverages (drinking natural mineral water (Nongfu Spring), orange juice (NFC), drinking pure milk (Jizhi), red wine (ChangYu), coffee (Nestle), black tea (Oriental leaves)) (5 mL). These bowls containing beverages were covered with glass and incubated at 37°C. Aliquots were taken at different time intervals for analyses.

The experiment to simulate actual application of bowls was similarly performed by keeping bowls on a laboratory bench (face up) for 24 h prior to adding different beverages.

### **3.18 Plate-streaking experiment**

A plate-streaking experiment was performed to test for the presence of viable bacteria. Typically, after 24 h culture, beverage aliquots (100  $\mu$ L) were taken and evenly coated on the surface of LB agar-coated petri dishes (diameter: 90 mm, thickness: 6 mm, LB: 1.5 g/L). These petri dishes were incubated at 37°C for 24 h prior to observation. Original beverages were used as the controls.

Beverage samples taken at 48 h and 72 h were similarly tested.

### **3.19 Interaction between P(4)(4) and polysaccharides**

The interaction between P(4)(4) and two polysaccharides on bacteria surface (lipopolysaccharide and peptidoglycan) were tested via an Octet assay (Abdiche et al., 2008) by using a BLI Automated Biosensor. Streptavidin (SA) biosensors and kinetic buffer (PBS, 0.02% Tween) were used. Each polysaccharide (1  $\mu$ g/mL) was biotinylated by Sulfo-NHS-Biotin (Pierce Biotechnology, Rockford, IL) at a 1:1 ratio. P(4)(4) was dissolved in DMSO (0.1 mL, 400  $\mu$ g/mL) then added in the kinetics buffer (1.9 mL) prior to measurement.

### **3.20 Statistical Analyses**

Results were analyzed with SPSS 25.0 and MedCalc 18.1 and are presented as mean  $\pm$  SD as indicated. Comparisons were performed between two groups using a two-tailed Student's t-test or ANOVA test when comparing more than two conditions. For all analyses,  $*p < 0.05$  and  $**p < 0.01$  were considered statistically significant. Each experiment was carried out at least three times independently. The sample size is pre-estimated to ensure statistical analysis and no sample was optionally excluded from analysis. No blinding was done in the analyses and quantifications.

**Reference:**

Abdiche, Y., Malashock, D., Pinkerton, A., and Pons, J. (2008). Determining kinetics and affinities of protein interactions using a parallel real-time label-free biosensor, the Octet. *Anal Biochem* 377, 209-217.

Nickoloff, J.A. (1995). *Electroporation protocols for microorganisms* (Totowa, N.J.: Humana Press).
